# Supplementary material for: Identification of an Ideal-like Fingerprint for a Protein Fold using Overlapped Conserved Residues based Approach
Source: PubMed Central journal article supplement — Sci Rep. 2014 Jul 10;4:5643. doi: 10.1038/srep05643 (PMC4090624; doi:10.1038/srep05643), 2014-07-10
Supplement: srep05643-s1.pdf [file srep05643-s1.pdf]

Identification of an Ideal-like Fingerprint for a Protein Fold using Overlapped Conserved Residues based Approach

Amit Goyal, Sriram Sokalingam, Kyu-Suk Hwang\*, Sun-Gu Lee\*

School of Chemical and Biomolecular Engineering, Pusan National University, Busan,  
Korea 609-735

## **Method:**

### **Extraction of OCR-based pattern for Green Fluorescent Proteins**

Overlapped conserved residues based on the three aspects of residue conservation, i.e. sequence, structure, and intramolecular interaction were depicted using the general multiple sequence alignment (MSA), structure based alignment (SBA) and supersecondary structure (SSS) -based alignment methods were employed, respectively. The three approaches were implemented independently to the target protein folds and the overlapped residues, among the conserved residues achieved by each method, were chosen. For this, 10 representative Green Fluorescent protein structures, as listed in Supplementary Table S6, were selected. Now, three independent alignment MSA, SBA and SSS were obtained for the representative sequence/structure. Supplementary Table S7, S8 and S9 comprise the alignment for MAS, SBA and SSS, respectively. Alignment using the MSA, SBA and SSS retrieved 55, 44 and 46 conserved positions respectively which are listed below.

#### **MSA: 55 conserved positions**

13P, 18L, 22V, 23N, 24G, 28S, 29V, 33G, 35G, 40G, 41K, 43T, 45K, 46F, 50T, 51G, 53L, 55V, 60L, 67G, 71F, 73R, 77H, 79K, 82D, 90E, 91G, 92Y, 101K, 102D, 103D, 106Y, 109R, 111E, 113K, 114F, 117D, 119L, 122R, 124E, 125L, 129D, 131K, 134G, 136I, 138G, 140K, 149N, 153M, 158K, 161I, 170N, 173D, 174G, 180D, 185N, 200Y

#### **MSA-based Sequence pattern**

[PGKTRE]-x(4)-[LCMI]-x(3)-[YVL]-[NTG]-[GD]-x(3)-[SQEKT]-[VCLMI]-x(3)-G-x-[GPS]-x(2,4)-G-[KRTDHE]-x-[TKEN]-x-[KREH]-[AFILM]-x(3)-[TSDKE]-[GSK]-x(0,2)-[LV]-x-[VFM]-x(4,10)-[LVI]-x(2,6)-[GS]-x(3)-[FIY]-x-[RTSKG]-x(3)-[HTGED]-x-[KGPSE]-x(0,2)-[DSNH]-x(7)-[EGN]-G-x(0,1)-[YIFL]-x(8)-[KDEQ]-x(0,8)-[DTN]-[GD]-x(2)-[YFLMACV]-

x(2)-[RQNHTSK]-x-[ERDTS]-x-[KTSER]-[FYLI]-x(2)-[DHNTG]-x(1,3)-[LIVF]-x(2)-  
[RKDNH]-x-[EQKTD]-[LFCIV]-x(3)-[GDN]-x-[HKPQR]-x(2,10)-[GS]-x-[IV]-x-[GQKRT]-x-  
[KPTQD]-x(6,8)-[NPTGS]-x(3)-[MLV]-x(4)-[KSGPTD]-x(1,2)-[ILV]-x(8)-[NTQKS]-x(2)-  
[DEGT]-[GP]-x(5,8)-[DHNTS]-x(4)-[NQK]-x(9,14)-[YAF]

### **SBA: 44 conserved positions**

10G, 13P, 18L, 19S, 20G, 22V, 24G, 27F, 28S, 33G, 40G, 41K, 46F, 60L, 71F, 77H, 82D, 89P,  
91G, 92Y, 95E, 100F, 102D, 103D, 106Y, 109R, 111E, 113K, 117D, 119L, 122R, 124E, 125L,  
139H, 144N, 152I, 159N, 161I, 170N, 173D, 174G, 175S, 183Q, 218M

### **SBA-based Sequence Pattern**

x(0,8)-[GSTEP]-x(2)-[PRKTE]-x(4)-[LVIM]-[DKHETS]-G-x-[VIL]-x-[GPD]-x(2)-F-[SEKT]-  
x(4)-[GS]-x(6)-G-[KRTDHE]-x(4)-[FIMAL]-x(11,13)-[LIV]-x(3,7)-[FY]-x(5)-[HGED]-x(1,4)-  
[DKNH]-x(6)-[PGTN]-x(0,1)-[GE]-[YFL]-x(2)-[EQTD]-x(4)-[FY]-x-[DGN]-[DGH]-x(2)-  
[YLMAVC]-x(2)-[RKNHTS]-x-[EQRDTS]-x-[KSTER]-x(3)-[DGNT]-x-[LIVF]-x(2)-  
[RSDKNH]-x-[EKTD]-[LCVIF]-x(6,13)-[HPDNKQ]-x(2,4)-[NHKRDG]-x(3)-[IYMVL]-x(4,6)-  
[NSGT]-x-[IVL]-x(8)-[NTQKS]-x(2)-[DPGT]-[GS]-[SHRGK]-x(7)-[QNTS]-x(24,34)-  
[MLVY]-x(11)

### **SSS: 46 SSS-determining residues**

13P, 18L, 19D, 20G, 22V, 23N, 24G, 28S, 33G, 40G, 41K, 46F, 50T, 55V, 64F, 66Y, 67G, 71F,  
77H, 79K, 90E, 91G, 92Y, 95E, 100F, 102D, 103D, 104G, 106Y, 109R, 111E, 113K, 122R, 124E,  
125L, 137L, 138G, 140K, 144N, 152I, 157Q, 161I, 170N, 180D, 191G, 196P

### **SSS-based Sequence Pattern**

[PRKTE]-x(4)-[LVIM]-[DKHETS]-G-x-[LVI]-x(0,2)-[NG]-[GSD]-x(3,8)-[SNEKT]-x(4)-[GS]-  
x(4,6)-G-[KRTDH]-x(4)-[FIMAL]-x(1,4)-[TDG]-x(2,4)-[VFML]-x(7,10)-[FAMCI]-x-[YI]-G-

x(3,6)-[FY]-x(5)-[HGED]-x-[KPS]-x(5,10)-[ETN]-G-x(0,2)-[YFL]-x(2)-[EQTD]-x(4)-[FY]-  
x(0,2)-[DHENQ]-[DPG]-G-x(1,2)-[YMLAVC]-x(2)-[RKNHTS]-x[EQRTDS]-x-[KSTER]-  
x(8,13)-[RSDNHK]-x-[EKTD]-[LCIVF]-x(6,11)-[LIFM]-[GPKQRT]-x-[KGTQD]-x(2,3)-  
[NHKRDGS]-x(7)-[IYMVL]-x(3,4)-[QSGT]-x(1,3)-[IVL]-x(8)-[NTQKS]-x(7,17)-[DQEHSR]-  
x(8,15)-[GRNKH]-x(4,8)-[PS]

Now, the amino acid positions found to be commonly conserved among the three different alignments were identified. The residues were called “Overlapped Conserved Residues” (OCR) and used to create the OCR fingerprint for the fold detection process. Sequence pattern can be generated using the overlapped positions from any of the sequence alignment.

**OCR: 24 overlapped conserved residues**

13P, 18L, 22V, 24G, 28S, 33G, 40G, 41K, 46F, 71F, 77H, 91G, 92Y, 102D, 103D, 106Y, 109R, 111E, 113K, 122R, 124E, 125L, 161I, 170N

**OCR fingerprint**

[PRKTE]-x(4)-[LVIM]-x(3)-[LVI]-x(1,3)-[GSD]-x(3,8)-[SNEKT]-x(4)-[GS]-x(4,6)-G-  
[KRTDH]-x(4)-[FIMAL]-x(24,25)-[FY]-x(5)-[HGED]-x(8,13)-G-x(0,2)-[YFL]-x(8,10)-  
[DHENQ]-[DPG]-x(2,3)-[YMLAVC]-x(2)-[RKNHTS]-x-[EQRTDS]-x-[KSTER]-x(8,13)-  
[RSDNHK]-x-[EKTD]-[LCIVF]-x(28,35)-[IVL]-x(8)-[NTQKS]

Further, the OCR<sup>S</sup> embedded in the beta strand region were identified and were used to generate the OCR<sup>S</sup> fingerprint.

**OCR<sup>S</sup>: 17 overlapped conserved residues**

13P, 18L, 22V, 28S, 33G, 41K, 46F, 92Y, 106Y, 109R, 111E, 113K, 122R, 124E, 125L, 161I, 170N

**OCR<sup>S</sup> fingerprint**

[PRKTE]-x(4)-[LVIM]-x(3)-[LVI]-x(5,12)-[SNEKT]-x(4)-[GS]-x(5,7)-[KRTDH]-x(4)-  
[FIMAL]-x(40,45)-[YFL]-x(13,14)-[YMLAVC]-x(2)-[RKNHTS]-x-[EQRTDS]-x-[KSTER]-  
x(8,13)-[RSDNHK]-x-[EKTD]-[LCIVF]-x(28,35)-[IVL]-x(8)-[NTQKS]

In addition, minimization of OCR<sup>S</sup> fingerprint, by eliminating the conserved positions individually, produced the OCR<sup>MIN</sup> fingerprint. The OCR-based fingerprints, such as OCR, OCR<sup>S</sup>, and OCR<sup>MIN</sup>, were used to detect the homologous proteins of a target fold, and their fold detection efficiencies were compared with those of the fingerprints obtained by MSA, SBA and SSS.

**Figure S1: Conserved sequence residues obtained by MSA, SBA and SSS methods.** Protein sequence patterns, as shown in figure from **A-L** were obtained using MSA, SBA, SSS and OCR-based approach for 12 protein folds in target dataset. The figure shows the fingerprints for following protein folds: **A** GFP-like protein, **B** Cupredoxin-like proteins, **C** Acid Proteases, **D** Ribosomal Protein L14, **E**  $\beta$ -Grasp (Ubiquitin-like) protein, **F** Nucleoside Triphosphate Hydrolase, **G** RNAase A-like proteins, **H** Cysteine Proteinases, **I** 50S Ribosomal Protein L25, **J** 50S Ribosomal Protein L6P, **K** Difydrofolate reductase-like proteins, **L** Pyruvate kinase N-terminal domain. Here, Distribution of conserved positions in secondary structure elements (SSEs) is shown for each alignment method. Sequence pattern is PROSITE-like pattern similar to Figure 2.

|            |                                                                                                                                             |                                                                      |                                            |                                                    |                                               |
|------------|---------------------------------------------------------------------------------------------------------------------------------------------|----------------------------------------------------------------------|--------------------------------------------|----------------------------------------------------|-----------------------------------------------|
| <b>MSA</b> | Strand1<br>x(1,2)-[PRKTH]-x(4)-[LVIM]-[DKHETS]-[G]-x-[LVI]-x(0,2)                                                                           | Loop<br>[NG]-[GSDN]-x(0,4)                                           | Strand2<br>x(3,4)-[SNEKT]-x(4)-[GS]-x(2,3) | Loop<br>x(1,4)-G                                   | Strand3<br>[KRTDHE]-x(4)-[FIMAL]-x(1,4)       |
| <b>SBA</b> | x-[PGKTRE]-x(4)-[LCMI]-x(3)-[YVL]                                                                                                           | [NTG]-[GD]                                                           | x(3)-[SQEKT]-[VCLMI]-x(3)-G-x-[GPS]-x(0,1) | x(2,3)-G                                           | [KRTDHE]-x-[TKEN]-x-[KREH]-[AFILM]-x(2)       |
| <b>SSS</b> | x-[PRKTE]-x(4)-[LVIM]-[DKHETS]-G-x-[VIL]                                                                                                    | x-[GPD]                                                              | x(2)-F-[SEKT]-x(4)-[GS]-x(3)               | x(1,3)-G                                           | [KRTDHE]-x(4)-[FIMAL]-x(2)                    |
| <b>OCR</b> | x(0,2)-[PRKTE]-x(4)-[LVIM]-x(3)-[LVI]-x(0,2)                                                                                                | x(2,6)                                                               | x(3,4)-[SNEKT]-x(2,3)-[GS]-x(2,3)          | x(2,5)                                             | [KRTDH]-x(4)-[FIMAL]-x(1,4)                   |
| <b>MSA</b> | Loop<br>x(0,1)-[TDG]-x(2,4)-[VFML]-x(5,10)-[FAMCI]-x-[YI]-G-x(3,6)-[FY]-x(5)-[HGED]-x-[KPS]-x(5,10)-[ETN]-G-x(0,1)                          |                                                                      |                                            |                                                    | Strand4<br>x(0,1)-[YFL]-x(2)-[EQTD]-x(4)-[FY] |
| <b>SBA</b> | x-[TSDKE]-[GSK]-x(0,2)-[LV]-x-[VFM]-x(4,10)-[LVI]-x(2,6)-[GS]-x(3)-[FIY]-x-[RTSKG]-x(3)-[HTGED]-x-[KGPSE]-x(0,2)-[DSNH]-x(7)-[EGN]-G-x(0,1) |                                                                      |                                            |                                                    | [YIFL]-x(8)                                   |
| <b>SSS</b> | x(9,11)-[LIV]-x(10)-[LIV]-x(3,7)-[FY]-x(5)-[HGED]-x(1,4)-[DKNH]-x(6)-[PGTN]-x(0,1)-[GE]                                                     |                                                                      |                                            |                                                    | [YFL]-x(2)-[EQTD]-x(4)-[FY]                   |
| <b>OCR</b> | x(38,43)                                                                                                                                    |                                                                      |                                            |                                                    | x(0,1)-[YFL]-x(8)                             |
| <b>MSA</b> | Loop<br>x(0,2)-[DHENQ]-[DPG]-G-x(0,1)                                                                                                       | Strand5<br>x(0,1)-[YMLAVC]-x(2)-[RKNHTS]-x-[EQRTDS]-x-[KSTER]-x(0,2) | Loop<br>x(2,10)                            | Strand6<br>x(2,4)-[RSDKNH]-x-[EKTD]-[LCIVF]-x(3,4) |                                               |
| <b>SBA</b> | [KDEQ]-x(0,8)-[DTN]-[GD]-x                                                                                                                  | x-[YFLMACV]-x(2)-[RQNHTSK]-x-[ERDTS]-x-[KTSER]-[FYLI]-x              | x-[DHNTG]                                  | x(1,3)-[LIVF]-x(2)-[RKDNH]-x-[EQKTD]-[LFCIV]-x(3)  |                                               |
| <b>SSS</b> | x-[DGN]-[DG]-x                                                                                                                              | x-[YLMAVC]-x(2)-[RKNHTS]-x-[EQRDTS]-x-[KSTER]-x(2)                   | x-[DGNT]                                   | x-[LIVF]-x(2)-[RSDKNH]-x-[EKTD]-[LCVIF]-x(3)       |                                               |
| <b>OCR</b> | x(4,6)                                                                                                                                      | x(0,1)-[YMLAVC]-x(2)-[RKNHTS]-x-[EQRTDS]-x-[KSTER]-x(0,2)            | x(2,10)                                    | x(2,4)-[RSDNHK]-x-[EKTD]-[LCIVF]-x(3,4)            |                                               |
| <b>MSA</b> | Loop<br>x(2,8)-[LIFM]-[GPKQRT]-x-[KGTQD]-x(2,3)-[NHKRDGS]-x(3)                                                                              | Strand7<br>x(4)-[IYMVL]-x(2,3)                                       | Loop<br>x(0,1)-[QSGT]-x(0,2)               | Strand8<br>x-[ILV]-x(8)-[NTQKS]-x(0,2)             | Loop<br>x(3,10)                               |
| <b>SBA</b> | [GDN]-x-[HKPQR]-x(2,10)-[GS]-x-[IV]-x-[GQKRT]-x-[KPTQD]-x(5,7)                                                                              | x-[NPTGS]-x(3)-[MLV]-x(2)                                            | x(2)-[KSGPTD]x(0,1)                        | x-[ILV]-x(8)-[NTQKS]                               | x(2)-[DEGT]-[GP]-x(1,4)                       |
| <b>SSS</b> | x(3,10)-[HPDNKQ]-x(2,4)-[NHKRDG]-x(3)                                                                                                       | x(4)-[IYMVL]-x(3)                                                    | x(1,3)-[NGST]                              | x-[IVL]-x(8)-[NTQKS]                               | x(2)-[DPGT]-[GS]-[SHRGK]                      |
| <b>OCR</b> | x(12,18)                                                                                                                                    | x(8)                                                                 | x(2,4)                                     | x-[IVL]-x(8)-[NTQKS]-x(0,2)                        | x(2,10)                                       |
| <b>MSA</b> | Strand9<br>x(4,5)-[DQEHSR]-x(7,9)                                                                                                           | Loop<br>x(1,9)-[GRNKH]-x(3,8)-[PS]-x(0,2)                            | Strand10<br>x(10,14)                       | Loop<br>x(3,8)                                     | Strand11<br>x(9,11)                           |
| <b>SBA</b> | x(4)-[DHNTS]-x(4)-[NQK]-x(2)                                                                                                                | x(6,11)                                                              | x-[YAF]-x(8)                               | x(8)                                               | x(11)                                         |
| <b>SSS</b> | x(7)-[QNTS]-x(4)                                                                                                                            | x(7,11)                                                              | x(10)                                      | x(2,8)                                             | x-[MLVY]-x(9)                                 |
| <b>OCR</b> | x(12,14)                                                                                                                                    | x(10,15)                                                             | x(10,14)                                   | x(3,8)                                             | x(9,11)                                       |

|            |                                                                            |                                        |                         |                          |                             |
|------------|----------------------------------------------------------------------------|----------------------------------------|-------------------------|--------------------------|-----------------------------|
|            | Strand1                                                                    | Loop1                                  | Strand2                 | Loop2                    | Strand3                     |
| <b>MSA</b> | x-[VAY]-x(4)                                                               | x-[MILF]-[KSTN]-[YVIAL]-x(2,3)         | x(0,5)                  | x(0,1)-[GSPR]-x          | x-[VILF]-x(3)-[NPK]         |
| <b>SBA</b> | x(2)-V-x-[LIMA]-x                                                          | x(5)-[TPQ]-x                           | x-[LIF]-x-[VIAL]-x      | x(3)                     | x-[VIL]-x-[WFLV]-x-[NP]     |
| <b>SSS</b> | V-x-[ILMV]-x(1,4)                                                          | x(0,3)-[DE]-x(1,4)-[YF]-x-[TPQ]-x(0,1) | x-[LFI]-x-[VIAL]-x(0,1) | x(1,2)-[GN]-[DET]-x(0,1) | x(0,2)-[VI]-x-[WFLV]-x(2,4) |
| <b>OCR</b> | x(4,10)                                                                    | x(2,8)-[YF]-x(3,0)                     | x(4,5)                  | x(2,4)                   | x(1,2)-[VI]-x(4,6)          |
|            | Loop3                                                                      |                                        | Strand4                 | Loop4                    | Strand5                     |
| <b>MSA</b> | x(3,4)-[PEGKQ]-x(7,11)-[LIV]-x(0,3)-[AVF]-x(2,11)-[MLYVF]-x(4,19)          |                                        | [QEK]-x(5)-[FLV]        | [TSKR]-x(2,4)            | G-x-[YF]-[YFVLI]-x          |
| <b>SBA</b> | x(3,4)-[PEGSQ]-[HE]-[NTG]-x(3,5)-[GDKN]-x(0,1)-[LIV]-x(2,8)-[MLYVI]-x(1,4) |                                        | [QEK]-x(5)-[FLVA]       | [TSKDR]-[ENTPQK]-x       | G-x-[YF]-x[YFVLI]-x-C       |
| <b>SSS</b> | x(4,8)-[NES]-x(5,7)-[GDK]-x-[IVLF]-x(10,25)                                |                                        | x(4,8)                  | x(1,2)[ESPT]-x(1,3)      | G-x-[YF]-x-[YFVLI]-x(0,1)   |
| <b>OCR</b> | x(13,18)-[IVLF]-x(14,20)                                                   |                                        | x(4,8)                  | x(3,5)                   | G-x-[YF]-x-[YFVLI]-x(0,1)   |
|            | Loop5                                                                      | Strand6                                |                         |                          |                             |
| <b>MSA</b> | C-x(2,4)-[HP]-x(3,4)-[ML]                                                  | x(3)-[VIL]-x-V-x                       |                         |                          |                             |
| <b>SBA</b> | C-x(2)-H-x(2)-[ML]                                                         | x(3)-[VIL]-x-V-x                       |                         |                          |                             |
| <b>SSS</b> | x(0,1)-C-x(2,4)-H-x(3,7)                                                   | x(2,3)[VIL]-x-V-x(0,1)                 |                         |                          |                             |
| <b>OCR</b> | x(0,1)-C-x(2,4)-H-x(3,7)                                                   | x(2,3)[VIL]-x-V-x(0,1)                 |                         |                          |                             |

**B**



|            |                                                                                             |                   |                |                                                   |  |        |
|------------|---------------------------------------------------------------------------------------------|-------------------|----------------|---------------------------------------------------|--|--------|
|            | Loop1                                                                                       | Strand1           | Loop2          | Strand2                                           |  |        |
| <b>MSA</b> | x(1,6)-[QT]-x-[TSN]-L-x-[KQR]-R-P                                                           | x(3)-[IVA]-x-[IV] | [GEN]-[GD]     | x(3)-[EKN]-[AVF]-L-L                              |  |        |
| <b>SBA</b> | x-[QT]-x-[TSN]-L-x-[KQR]-R-P                                                                | x(3)-[IVA]-x-[IV] | [GEN]-[GD]     | x(3)-[EKN]-[AVF]-L-L                              |  |        |
| <b>SSS</b> | x(1,6)-[QT]-x-[TSN]-L-x-[KQR]-R-P                                                           | x(3)-[IVA]-x-[IV] | [GEN]-[GD]     | x(3)-[EKN]-[AVF]-L-L                              |  |        |
| <b>OCR</b> | x(9,14)                                                                                     | x(3)-[IVA]-x-[IV] | x(2)           | x(3)-[EKN]-[AVF]-L-L                              |  |        |
|            | Loop3                                                                                       |                   |                | Strand3                                           |  | Loop4  |
| <b>MSA</b> | [DN]-T-G-A-D-x-[TS]-[VI]-[ILFV]-x-[EGRT]-x-[SNEDH]-[LFY]-[PGQN]-x(0,6)-[GNPR]-[RNHGK]-x     |                   |                | [KTSQ]-x(1,3)-[IVM]-x-G                           |  | [IV]-G |
| <b>SBA</b> | [DN]-T-G-A-D-x-[TS]-[VI]-[ILFV]-x-[EGRT]-[MVIFY]-[SNEQ]-x(3)-[RNHE]-x                       |                   |                | x-[PRQ]-[KQG]-x-[IVM]-x-G                         |  | [IV]-G |
| <b>SSS</b> | [DN]-T-G-A-D-x-[TS]-[VI]-[ILFV]-x-[EGRT]-x(1,6)-[SNEDK]-[LFY]-[PGQR]-x(0,1)-[GNPK]-x(2)     |                   |                | x(0,3)-[KTSG]-[PRT]-[KQG]-x(2,4)                  |  | x(2,6) |
| <b>OCR</b> | x(18,23)                                                                                    |                   |                | x(5,8)                                            |  | x(2,6) |
|            | Strand4                                                                                     |                   | Loop5          | Strand5                                           |  |        |
| <b>MSA</b> | G-x(3,4)-[RKT]-x(3)-[QNP]-[IV]-x-[IL]-E-x                                                   |                   | x-[GND]        | [HKER]-[KRNH]-[AVIY]-x(2)-[TQR]-[VICM]-[LMI]-x(2) |  |        |
| <b>SBA</b> | G-x(2)-[KNRE]-x(2)-[QENS]-x(2,3)-[IV]-x-[IL]-[EK]-x                                         |                   | x-[GNT]        | [HKQR]-x-[AVI]-x(2)-[TNR]-[VIM]-[LMC]-x(2)        |  |        |
| <b>SSS</b> | x(3,51)-[RKT]-x(3)-[QNP]-[IV]-x-[IL]-[EK]-x                                                 |                   | x(1,7)-[GHNQT] | x(1,2)-[AVI]-x(2)-[TSNR]-[VIM]-[LMC]-x(1,2)       |  |        |
| <b>OCR</b> | x(8,10)-[IV]-x-[IL]-[EK]-x                                                                  |                   | x(2,8)         | x(1,2)-[AVI]-x(2)-[TSNR]-[VIM]-[LMC]-x(1,2)       |  |        |
|            | Loop6                                                                                       |                   |                |                                                   |  |        |
| <b>MSA</b> | [PDN]-x(4,12)-[IVL]-[IFL]-G-R-[ND]-x-[LM]-x(2)-[ILF]-[GN]-[ACMI]-[TSRK]-L-x-[FLM]           |                   |                |                                                   |  |        |
| <b>SBA</b> | [PDS]-x(3)-[NPT]-[IVL]-[IFL]-G-R-[ND]-x-[LM]-x(2)-[ILF]-[GN]-[ACMI]-[TSRK]-L-x-[FLM]        |                   |                |                                                   |  |        |
| <b>SSS</b> | x(1,3)-[PDS]-x(3)-[NPT]-[IVL]-[IFL]-G-R-[ND]-x-[LM]-x(2)-[ILF]-[GN]-[ACMI]-[TSRK]-L-x-[FLM] |                   |                |                                                   |  |        |
| <b>OCR</b> | x(21,24)                                                                                    |                   |                |                                                   |  |        |

**C**

|            |                                                                                                                                           |                                       |                                    |                                    |
|------------|-------------------------------------------------------------------------------------------------------------------------------------------|---------------------------------------|------------------------------------|------------------------------------|
|            | Loop1                                                                                                                                     | Strand1                               | Loop2                              | Strand2                            |
| <b>MSA</b> | [IL]-[QPE]-x-[EQG]-x                                                                                                                      | x-[LIMV]-[KENT]-[VC]                  | A-D-N-[ST]-G                       | A-R-[EKRN]-[VIL]-x-[VCI]- I-x-V    |
| <b>SBA</b> | [QPE]-x-[EQG]-x                                                                                                                           | x-[LIMV]-[KENT]-[VC]                  | A-D-N-[ST]-G                       | A-[RK]- [EKRN]-[VIL]-x-[VCI]-I-x-V |
| <b>SSS</b> | [EQG]-x                                                                                                                                   | x (1,3)-[LIMV]-[KENT]-x(0,1)          | x(0,1)-A-D-N-x(0,1)-[GT]-x(0,3)    | x(0,2)-[EKRN]-[VIL]-x(1,7)         |
| <b>OCR</b> | x(4,24)                                                                                                                                   | x (1,3)-[LIMV]-[KENT]-x(0,1)          | x(5,8)                             | x(0,2)-[EKRN]-[VIL]-x(1,7)         |
|            | Loop3                                                                                                                                     | Strand3                               | Loop4                              | Strand4                            |
| <b>MSA</b> | x-[GK]-x-[SKGH]-[GNHS]-x(3,7)-A-x[IVL]-G-D                                                                                                | x-[VI]-x-[AIV]-[TS]-[VI]-[KT]-[DEK]-x | x-P-[GRE]-x(1,4)-[KER]-[GKR]-[QDK] | V-x-[KPEN]-A-[VI]-[VI]-[VI]-R      |
| <b>SBA</b> | x-[GK]-x-[SKGRH]-x(1,2)-[RKP]-x-A-x-[IVL]- G-D                                                                                            | x-[VI]-x-[AIV]-[TS]-[VI]-[KT]-[DEK]-x | x(5,8)- [GKR]-[QDK]                | V-x-[KPEN]-A-[VI]-[VI]-[VI]-R      |
| <b>SSS</b> | x(1,5)-G-x(3,6)-[RK]-x(1,3)-A-x-[IVL]-G-x(1,2)                                                                                            | x(0,1)-[VI]-x-[AIV]-[TS]-x(0,4)       | x(1,4)-P-[GRE]-x(2,5)-[GKR]-x      | x(1,2)-[KPEN]-A-x(0,4)             |
| <b>OCR</b> | x(13,18)                                                                                                                                  | x(0,1)-[VI]-x-[AIV]-[TS]-x0,4)        | x(7,13)                            | x(1,2)-[KPEN]-A-x(0,4)             |
|            | Loop5                                                                                                                                     |                                       |                                    | Strand5                            |
| <b>MSA</b> | [TQ]-x-[RK]-[GESP]-[VIYW]-[RK]-R-[PKR]-D-G-x(2)-[IVL]-x-F-[DE]-[EDG]-N                                                                    |                                       |                                    | A-x-V-[IL]-[ILVA]                  |
| <b>SBA</b> | [TQ]-x-[RK]-[GESP]-[VIYW]-[RK]- R-[PKR]-D-G-x(2)-[IVL]-x-F-[DE]-[EDG]-N                                                                   |                                       |                                    | A-x-V-[IL]-[ILVA]                  |
| <b>SSS</b> | x(0,4)-[TQ]-x-[RK]-[GESP]- [VIYW]-[RK]- R-[PKR]-D-G-x(2)-[IVL]-x-F-[DE]-[EDG]-x(1,4)                                                      |                                       |                                    | x(0,3)-[IL]-x(0,1)                 |
| <b>OCR</b> | x(18,25)                                                                                                                                  |                                       |                                    | x(0,3)-[IL]-x(0,1)                 |
|            | Loop6                                                                                                                                     |                                       |                                    |                                    |
| <b>MSA</b> | [RND]-[DNEQ]-x(0,1)-[DQSKN]-x(2)-G-[TS]-x-[IVL]-x-G-P-[VI]-x-[RK]-E-[LCVA]-x-[DESQ]-x(1,2)-[FW]-x-[KRS]-[IV]-x-[ST]-x(2)-[PGT]-x-[VI]     |                                       |                                    |                                    |
| <b>SBA</b> | [RND]-[DNEQ]-[DQSKN]-x(2)-G-[TS]-x-[IVL]-x-G-P-[VI]- x-[RK]-E-[LCVA]-x-[DESQ]-x(1,2)-[FW]-x-[KRS]-[IV]-x-[ST]- x(2)-[PGT]-x-[VI]          |                                       |                                    |                                    |
| <b>SSS</b> | x-[DNE]-x(2,3)-[SEDQ]-x(2)- G-[TS]-x-[IVL]-x-G-P-[VI]- x-[RK]-E-[LCVA]-x(1,2)-[KEDQ]-x-[FW]-x-[KRS]-[IV]-x-[ST]- x(2)-[PGT]-x(1,2)-[ILAV] |                                       |                                    |                                    |
| <b>OCR</b> | x(33,35)                                                                                                                                  |                                       |                                    |                                    |

**D**

|            |                                     |                         |                                                                                               |                                 |                                             |
|------------|-------------------------------------|-------------------------|-----------------------------------------------------------------------------------------------|---------------------------------|---------------------------------------------|
|            | Strand1                             | Loop1                   | Strand2                                                                                       | Loop2                           | Helix1                                      |
| <b>MSA</b> | [IL]-x-[VI]-x(1,2)                  | x(3,4)-[KRDSQ]          | x-[IWVL]-x-[LIVF]-[EDNKS]                                                                     | [VIL]-x(2)-[STEHD]-[DST]-[TKHP] | [IVL]-x(2)-[VIFL]-x(3)-[IVYF]-x-[DEQK]-x(2) |
| <b>SBA</b> | [IL]-x-[VI]-x-[TSGD]                | x(2,3)-[KRDSQ]          | x-[IWVL]-x-[LIVF]-[EDNKS]                                                                     | [VIL]-x(2)-[STEHD]-[DST]-[TKHP] | [IVL]-x(2)-[VIFL]-x(3)-[IVYF]-x-[DEQK]-x(2) |
| <b>SSS</b> | [IL]-x-[VI]-x(1,2)                  | x(3,5)                  | x(3,4)-[LIVF]-[EDNKS]-x(0,2)                                                                  | x(0,2)-[PTRK]-[STEHD]-x(0,3)    | x(2,3)-[VIFL]-x(3)-[IVFY]-x-[DEKQ]-x(0,2)   |
| <b>OCR</b> | [IL]-x-[VI]-x(1,2)                  | x(3,5)                  | x(3,4)-[LIVF]-[EDNKS]-x(0,2)                                                                  | x(4,6)                          | x(9,12)                                     |
|            | Loop3                               | Strand3                 | Loop4                                                                                         |                                 |                                             |
| <b>MSA</b> | G-x-[PSE]-x(2)-[QNSK]               | x-[RS]-[LF]-x-[FY]      | x-G-x(2)-[LMI]-x(2)-[GEDNTK]-[RKQHDE]-x(3)-[DESQ]-[YL]-[NKHGED]-[IML]-x-[KNGDES]-[EHGN]-[SHD] |                                 |                                             |
| <b>SBA</b> | G-x-[PSE]-x(1,2)-[QNSK]             | x-[RS]-[LF]-x-[FY]      | x-G-x(5)-[GEDNTK]-[RKQHDE]-x(3)-[DESQ]-[YL]-[NKHGED]-[IML]-x-[KNGDES]-[SHD]                   |                                 |                                             |
| <b>SSS</b> | x(0,2)-G-x-[PSE]-x(2)-[QNSK]-x(0,1) | x(0,1)-[RS]-[LF]-x-[FY] | x(1,6)-G-x(2)-[LMI]-x(2)-[GEDNT]-x-[TG]-x(2)-[DSEQ]-x(0,5)-[EHGN]-x(0,1)                      |                                 |                                             |
| <b>OCR</b> | x(6,8)                              | x(0,1)-[RS]-[LF]-x-[FY] | x(19,20)                                                                                      |                                 |                                             |
|            | Strand4                             |                         |                                                                                               |                                 |                                             |
| <b>MSA</b> | x-[LVI]-x-[LVA]                     |                         |                                                                                               |                                 |                                             |
| <b>SBA</b> | x-[LVI]-x-[LVA]                     |                         |                                                                                               |                                 |                                             |
| <b>SSS</b> | x(0,1)-[LVI]-x-[LVA]                |                         |                                                                                               |                                 |                                             |
| <b>OCR</b> | x(0,1)-[LVI]-x-[LVA]                |                         |                                                                                               |                                 |                                             |

|            |                                                  |                             |                                                                      |                                  |                                     |                     |
|------------|--------------------------------------------------|-----------------------------|----------------------------------------------------------------------|----------------------------------|-------------------------------------|---------------------|
|            | Strand1                                          | Loop1                       | Helix1                                                               | Loop2                            | Strand2                             | Loop3               |
| <b>MSA</b> | [KR]-LVI-x-[IVLM]-[VLIF]-G                       | x(4)-G                      | K-[TS]-x-[LI]-x(6)                                                   | [DNKGES]-[QHKTDE]-x(6,7)-[TE]-x  | x(1,2)-[NSDRT]-[YFIV]-x(2,6)-[VICL] | [DNET]-x            |
| <b>SBA</b> | [KR]-LVI-x-[IVLM]-[VLIF]-G                       | x(4)-G                      | K-[TS]-x-[LI]-x(5,6)                                                 | [DNKG]-x(4,7)                    | x-[EDGN]-x(7,8)                     | x(0,2)              |
| <b>SSS</b> | [KR]-LVI-x-[IVLM]-[VLIF]-x(0,1)                  | x(5,6)                      | K-[TS]-x-[LI]-x(3,6)                                                 | x(0,2)-[DNKG]-x(7,8)-[TE]-x(1,3) | x(0,1)-[EDGN]-x(3,7)                | x(2,6)              |
| <b>OCR</b> | [KR]-LVI-x-[IVLM]-[VLIF]-x(0,1)                  | x(6)                        | x(7,10)                                                              | x(11,14)                         | x(5,10)                             | x(2,6)              |
|            | Strand3                                          | Loop4                       | Helix2                                                               | Loop5                            |                                     |                     |
| <b>MSA</b> | [KERQS]-x-[VCYFLI]-x-[LMF]-x-D-x                 | x-G-x                       | [EPHKTD]-[DERQSK]-[YFLI]-[DSQRP]-x(1,6)                              | [YMAIF]-x(3)-[DEMHQ]             |                                     |                     |
| <b>SBA</b> | (1,2)-[VCYFLI]-x-[LMF]-x-[LIV]-x-D-x             | x-G-x(0,1)                  | x(4,10)                                                              | [YMAIF]-x(4)                     |                                     |                     |
| <b>SSS</b> | x(1,4)-[LMF]-x-[LIV]-x-D-x(0,1)                  | x(1,2)-G-x(1,8)             | x(6,11)                                                              | x(2,4)                           |                                     |                     |
| <b>OCR</b> | x(1,4)-[LMF]-x-[LIV]-x-D-x(0,1)                  | x(3,11)                     | x(6,11)                                                              | x(2,4)                           |                                     |                     |
|            | Strand4                                          | Loop6                       | Helix3                                                               |                                  | Loop7                               |                     |
| <b>MSA</b> | x-[IFCVL]-[LVI]-[MCLFWY]-[CV]-[FYV]-x            | x(3)                        | [PTEKR]-x-[STR]-[LFMIV]-[EKTQGN]-x(3)-[EQSNPRE]-x(9,13)              |                                  | x(2)-[NDEGK]-[VFAI]-x               |                     |
| <b>SBA</b> | x-[IFCVL]-[LVI]-[MCLFWY]-[CV]-[FYV]-x            | x(3)                        | [PTEKR]-x-[STR]-[LFMIV]-[EKTQGN]-x(3,4)-[KQSNPE]-x(3,4)-[VIFLM]-x(3) |                                  | x(2)-[NDPEGK]-[VFAI]-x              |                     |
| <b>SSS</b> | x-[IFCVL]-[LVI]-[MCLFWY]-[CV]-[FYV]-x            | x(3,6)                      | x(0,6)-[ILVM]-x(8,16)                                                |                                  | x(3,9)                              |                     |
| <b>OCR</b> | x-[IFCVL]-[LVI]-[MCLFWY]-[CV]-[FYV]-x            | x(3,6)                      | x(15,18)                                                             |                                  | x(3,9)                              |                     |
|            | Strand5                                          | Loop8                       | Helix4                                                               | Loop9                            | Strand6                             | Loop10              |
| <b>MSA</b> | [IMFLV]-[IVLM]-[LVI]-[VLF]-x-[NT]                | [KQ]-x(15,18)-[MLWV]-x(0,6) | x(1,9)-[RSKDQ]-x                                                     | x(2)-[FICW]                      | x-[YFI]-x(2)                        | x(2)-A-x(4)-[GND]   |
| <b>SBA</b> | [IMFLV]-[IVLM]-[LVI]-[VLF]-x-[NT]                | [KQ]-x(14,18)-[VILM]-x      | x(10,11)                                                             | x(2,3)                           | x-[YFI]-x(2)                        | x(2)-A-x(4)-[GND]   |
| <b>SSS</b> | x(0,1)-[IMFLV]-[IVLM]-[LVI]-[VLF]-x-[NT]         | x(1,2)-D-x(6,20)            | x(4,8)-[NRQKED]-x(1,5)                                               | x(2,5)                           | x(0,2)-[YFI]-x(0,3)                 | x(0,4)-A-x(4)-[GND] |
| <b>OCR</b> | x(0,1)-[IMFLV]-[IVLM]-[LVI]-[VLF]-x-[NT]         | x(1,23)                     | x(10,12)                                                             | x(2,5)                           | x(0,2)-[YFI]-x(0,3)                 | x(7,10)             |
|            | Helix5                                           |                             |                                                                      |                                  |                                     |                     |
| <b>MSA</b> | [VL]-x-[EDQRP]-x-[FIMAL]-x(2)-[ALIV]-x-[RKQTDEN] |                             |                                                                      |                                  |                                     |                     |
| <b>SBA</b> | [VL]-x-[EDQRP]-x-[FIML]-x(2)-[ALI]-x-[RKQTDEN]   |                             |                                                                      |                                  |                                     |                     |
| <b>SSS</b> | x(0,3)-[VAIL]-x(3)-[ALIVM]                       |                             |                                                                      |                                  |                                     |                     |
| <b>OCR</b> | x(11,14)                                         |                             |                                                                      |                                  |                                     |                     |

|            |                                                            |                                                            |                                       |                                                    |                          |                        |
|------------|------------------------------------------------------------|------------------------------------------------------------|---------------------------------------|----------------------------------------------------|--------------------------|------------------------|
| <b>MSA</b> | Helix1<br>x(0,9)                                           | Loop1<br>x(0,11)-[NRPQ]                                    | Helix2<br>x-C-[NETD]-x-[MAIV]-M-x(2)  | Loop2<br>x-[NKGR]-x(4,9)-C-K-[PDNE]                | Strand1<br>x-N-T-F-[VIL] | Loop3<br>[HRQ]-x-[STN] |
| <b>SBA</b> | x(0,9)                                                     | x(0,11)                                                    | x(1,2)-C-[NETD]-x-[MAIV]-M-x(1,2)     | x(3,4)-[KSQNRG]-x(1,2)-C-K-[PDNE]                  | x-N-T-F-[VIL]            | [HRQ]-x-[STN]          |
| <b>SSS</b> | x(0,11)                                                    | x(0,12)                                                    | x(0,3)-C-[NETD]-x-[MAIV]-M-x(2,4)     | x(2,8)-[KTQRG]-x(2)-C-K-[PDNE]                     | x-N-T-F-[VIL]            | [HRQ]-x-[STN]          |
| <b>OCR</b> | x(0,11)                                                    | x(0,12)                                                    | x(7,11)                               | x(8,14)                                            | x-N-T-F-[VIL]            | x(3)                   |
| <b>MSA</b> | Helix3<br>x(2)-[DNSHR]-[VI]-x(2)-[VI]-C                    | Loop4<br>x(2,3)                                            | Strand2<br>[SGET]-[QKNGD]             | Loop5<br>x(2,7)-[TRNE]-[ND]                        | Strand3<br>[CL]-x(2)     | Loop6<br>S-x(2)        |
| <b>SBA</b> | x(2)-[DNSHR]-[VI]-x(2)-[VI]-C                              | [SGET]-[QGN]                                               | [KSQNT]-[NPSR]-x                      | x(1,7)-[ND]                                        | [CL]-x(2)                | S-x(2)-[THRSQP]        |
| <b>SSS</b> | x(2)-[DNSHR]-[VI]-x(2)-[VI]-x(0,2)                         | x(1,4)                                                     | x(0,4)                                | x(2,10)                                            | x(2,4)                   | x(0,2)-[SQP]-x(0,3)    |
| <b>OCR</b> | x(7,9)                                                     | x(1,4)                                                     | x(0,4)                                | x(2,10)                                            | x(2,4)                   | x(3,4)                 |
| <b>MSA</b> | Strand4<br>[THRSQP]-[MFV]-[SQRPT]-[IVL]-x-[DTH]-C-[RTDK]-x | Loop7<br>x(0,2)-[TKPHR]-[GS]-x-[SQEN]-[KPNR]-x(2)-[NP]-C-x | Strand5<br>Y-x(2)-[TSRK]-x(3)-[KR]    |                                                    |                          |                        |
| <b>SBA</b> | [MFV]-[SQRPT]-[IVL]-x-[DTH]-C-[RTDK]-x                     | x(1,3)-[SG]-x(2)-[PSR]-[NP]-C-x                            | Y-x(2)-[TSRK]-x(3)-[KR]               |                                                    |                          |                        |
| <b>SSS</b> | [MFV]-[SQRPT]-[IVL]-x(2)-C-[RTDK]-x(1,3)                   | x(1,5)-[SQEN]-[KPNR]-x-P-[NP]-C-x(0,1)                     | x(0,1)-Y-x(2)-[TSRK]-x(3)-[KR]-x(0,1) |                                                    |                          |                        |
| <b>OCR</b> | [MFV]-[SQRPT]-[IVL]-x(2)-C-[RTDK]-x(1,3)                   | x(7,12)                                                    | x(0,1)-Y-x(2)-[TSRK]-x(3)-[KR]-x(0,1) |                                                    |                          |                        |
| <b>MSA</b> | Loop8<br>x                                                 | Strand6<br>[IYV]-[IV]-[VIL]-x-C-[EGD]                      | Loop9<br>[GNK]-[NGKRE]-x(0,10)        | Strand7<br>[VWL]-P-[VA]-H-[FLY]-[DE]-x-[STG]-[VFI] |                          |                        |
| <b>SBA</b> | x                                                          | [IYV]-[IV]-[VIL]-x-C-[EGD]                                 | [GNK]-x(1,3)                          | [VWL]-P-[VA]-H-[FLY]-[DE]-[STG]                    |                          |                        |
| <b>SSS</b> | x(0,2)                                                     | x(0,2)-[IV]-[VIL]-x-C-[EGD]-x(0,1)                         | x(0,4)-[GD]-x(0,5)                    | x(0,1)-[VWL]-P-[VA]-H-[FLY]                        |                          |                        |
| <b>OCR</b> | x(0,2)                                                     | x(0,2)-[IV]-[VIL]-x-C-[EGD]-x(0,1)                         | x(2,10)                               | x(0,1)-[VWL]-P-[VA]-H-[FLY]                        |                          |                        |

|            |                                                                          |                                        |                                |                                            |                                     |              |
|------------|--------------------------------------------------------------------------|----------------------------------------|--------------------------------|--------------------------------------------|-------------------------------------|--------------|
|            | Strand1                                                                  | Loop5                                  | Helix4                         | Loop6                                      | Strand2                             |              |
| <b>MSA</b> | [TGDNS]-x(1,2)-[NRQDES]                                                  | [VIL]-x(3,4)                           | x(1,3)-[LMI]-x(6,7)            | [QGNH]-x(1,2)                              | [VI]-x(3)-[LVIF]                    |              |
| <b>SBA</b> | [TGDNS]-x(2)-[NRQES]                                                     | [VIL]-x(2,4)                           | x(2,3)-[LMI]-X(3)-[VIL]-x(2)   | [QGNS]-x                                   | [VI]-x(3)-[LVIF]                    |              |
| <b>SSS</b> | x(2,5)[NRQDES]-x(0,1)                                                    | x(1,4)-[NQD]-x(0,1)                    | x(0,3)-[LMI]-x(3)-[VIL]-x(2,3) | x(0,1)-[QGNH]-x(1,2)                       | [VI]-x(3)-[LVIF]                    |              |
| <b>OCR</b> | x(2,5)[NRQDES]-x(0,1)                                                    | x(3,5)                                 | x(7,11)                        | x(2,3)                                     | [VI]-x(3)-[LVIF]                    |              |
|            | Loop7                                                                    |                                        |                                | Strand3                                    |                                     | Loop8        |
| <b>MSA</b> | x(4,7)-[FW]-x(2)-Y-x-[SGEK]-[GR]-x-[FYMI]-x-[GESQH]-x(7,11)              |                                        |                                | H-x-[IV]-x-[IAVL]-[VL]-G-[YW]-[GNS]-x(0,3) |                                     | x(0,11)      |
| <b>SBA</b> | x(4,6)-[FW]-x(2)-Y-x-[SGEKR]-[GT]-[IV]-[FYMI]-x-[GESRH]-x(3,7)           |                                        |                                | H-x-[IV]-x-[IAL]-[VL]-G-[YFW]-x(0,3)       |                                     | x(0,2)       |
| <b>SSS</b> | x(2,6)-[FW]-x(2)-Y-x-[SGEK]-[GR]-x-[FYMI]-x-[GESQH]-x(3)-[TNSHDE]-x(0,3) |                                        |                                | H-x-[IV]-x-[IAVL]-[VL]-G-x(1,4)            |                                     | x(0,1)-[GDP] |
| <b>OCR</b> | x(17,27)                                                                 |                                        |                                | H-x-[IV]-x-[IAVL]-[VL]-G-x(1,4)            |                                     | x(1,2)       |
|            | Strand4                                                                  | Loop9                                  |                                | Strand5                                    | Loop10                              | Strand6      |
| <b>MSA</b> | x(2)-Y-[WIY]-[IL]-[VI]-[KRG]                                             | N-S-W-[DGTN]-[TQEP]-x-W-G-x-[EQKNGR]-G |                                | [YF]-x(2)-[IMF]-x                          | (5,9)-[CM]-x-[ILV]-x(1,4)           | x(4)         |
| <b>SBA</b> | x(0,2)-Y-[WI]-[IL]-[VI]-[KRG]                                            | N-S-W-[DGTN]-[TQEP]-x-W-G-x-[EQKNGR]-G |                                | [YF]-x(2)-[IMF]-x                          | x(3,6)-[GNDR]-x-[CM]-x-[ILV]-x(4)   | x(4)         |
| <b>SSS</b> | x(0,3)-[WIY]-[IL]-[VI]-[KRG]                                             | N-S-W-[DGTN]-[TQEP]-x-W-G-x-[EQKNGR]-G |                                | [YF]-x(2)-[IMF]-x(0,1)                     | x(3,8)-[GNRD]-x-[CM]-x-[ILV]-x(3,4) | x(3,4)       |
| <b>OCR</b> | x(0,3)-[WIY]-[IL]-[VI]-[KRG]                                             | x(11)                                  |                                | [YF]-x(2)-[IMF]-x(0,1)                     | x(11,15)                            | x(3,4)       |

|            | Loop1  | Strand1                         | Loop2                         | Helix1                            | Loop3               | Strand2                        |
|------------|--------|---------------------------------|-------------------------------|-----------------------------------|---------------------|--------------------------------|
| <b>MSA</b> | [FYM]  | [TRE]-[IL]-[NKT]-A-x(2)         | R-x(0,4)                      | x(0,1)-[GKT]-x-[SK]-x(2,3)-L-[RD] | x(2,3)              | x-[FLI]-x(2)-[IV]-[IMA]-Y-[GN] |
| <b>SBA</b> | x(0,2) | x(0,1)-[ILM]-[NKER]-[AL]-x(0,1) | x(3)-[QETR]-x(0,1)            | x(0,3)-[SP]-[RSK]-x(3)            | x(2)-[NGS]          | x-[FLI]-x(2)-[IV]-[IMA]-Y-[GN] |
| <b>SSS</b> | x(2,3) | x(2,8)                          | x(0,4)-[ER]-[QET]-[GP]-x(0,4) | x(2,6)-[RQ]-x(0,4)                | x(1,2)-[NGE]-x(0,3) | x(2,5)-[IV]-[IMA]-Y-x(0,1)     |
| <b>OCR</b> | x(2,3) | x(2,8)                          | x(4,11)                       | x(4,9)                            | x(1,5)              | x(4,7)-[IV]-[IMA]-Y-x(0,1)     |

|            | Loop4               | Strand3                         | Helix2                    | Loop5                                   | Strand4     |
|------------|---------------------|---------------------------------|---------------------------|-----------------------------------------|-------------|
| <b>MSA</b> | x(0,1)-[KR]         | [EH]-x-[PN]-x(2)-[IVF]-x-[LV]-D | x(3)-[VF]-x-[NKR]-[MVA]-x | x-[KQ]-x-[ES]-x(2)-[SHG]-x-[VIF]-x      | x(2)-[VL]-x |
| <b>SBA</b> | [GRK]-x(0,1)        | x(1,2)-[PN]-x(2)-[IVF]-x-[LV]-D | x(3)-[VF]-x-[NKR]-[MVA]-x | x-[KQ]-x(3,4)-[SHT]-x-[VLI]-[LIFV]      | x(4)        |
| <b>SSS</b> | x(0,1)-[KGR]-x(0,4) | x(1,6)-[IVF]-x(1,3)             | x(1,6)D-[KR]-[VA]-x(0,4)  | x(0,7)-[ESG]-[FIL]-x(1,2)-[EHD]-x(0,10) | x(2,5)      |
| <b>OCR</b> | x(2,6)              | x(1,6)-[IVF]-x(1,3)             | x(3,8)-[VA]-x(0,4)        | x(4,20)                                 | x(2,5)      |

|            | Loop6                             | Strand5                    | Loop7                          | Strand6                   | Loop8        |
|------------|-----------------------------------|----------------------------|--------------------------------|---------------------------|--------------|
| <b>MSA</b> | [DG]-G-[KQE]-[EST]-[ILF]-[KP]     | x(2)-[AV]-[QRK]-x-V-[QN]-x | [HD]-[PK]-x-[KR]-[PR]-x        | x(2)-H-[IV]-D-F-[VFY]-x   | [ALV]        |
| <b>SBA</b> | [DPE]-[GD]-[KQE]-[EST]-[ILF]-[KP] | x(2)-[AV]-[QRK]-x-V-[QN]-x | [HD]-[PK]-x-[KR]-[PR]-x        | x(1,2)-H-[IV]-D-F-[VFY]-x | [ALV]        |
| <b>SSS</b> | x(0,4)-[DK]-[GA]-x(1,6)           | x(2,12)                    | x(0,8)-[PK]-x-[KR]-[PR]-x(0,6) | x(0,6)-F-[VFY]-x(0,1)     | x(0,1)-[ALV] |
| <b>OCR</b> | x(0,4)-[DK]-[GA]-x(1,6)           | x(2,12)                    | x(0,8)-[PK]-x-[KR]-[PR]-x(0,6) | x(0,6)-F-[VFY]-x(0,1)     | x(0,1)-[ALV] |

|            |                                                                        |                                     |                                                |                                    |                                                               |                               |
|------------|------------------------------------------------------------------------|-------------------------------------|------------------------------------------------|------------------------------------|---------------------------------------------------------------|-------------------------------|
| <b>MSA</b> | Strand1<br>[RSEK]-x-[ETNQP]-[LMVI]-x                                   | Loop1<br>[IV]-P-x-[DGK]-V           | Strand2<br>[DTS]-[AVI]-[EQTSK]-x(2)            | Loop2<br>x(2)                      | Strand3<br>x-[IV]-[TEK]-[VI]-x                                | Loop3<br>G-[DPK]-x            |
| <b>SBA</b> | x(0,2)-[ETNQP]-[LMVI]-x                                                | [IV]-P-x-[DGK]-V                    | [DTS]-[AVI]-[EQTSK]-x(2)                       | x(2)                               | x-[IV]-[TEK]-[VI]-x-G                                         | [DPK]-x                       |
| <b>SSS</b> | x(0,7)-[LMVI]-x                                                        | x(0,2)-[IV]-P-x-[DGK]-V-x(0,2)      | x(0,2)-[EQTSK]-x(1,2)                          | x(2,3)                             | x-[IV]-x-[TEK]-x(0,3)                                         | x(0,3)-[DPK]-x(1,4)           |
| <b>OCR</b> | x(0,7)-[LMVI]-x                                                        | x(5,7)                              | x(0,2)-[EQTSK]-x(1,2)                          | x(2,3)                             | x-[IV]-x-[TEK]-x(0,3)                                         | x(2,9)                        |
| <b>MSA</b> | Strand4<br>G-[SKTE]-[VLI]-[TKE]-x(2)                                   | Loop4<br>[LFV]-x(2,3)-[ILVM]        | Strand5<br>[DTRE]-[VFI]-x(0,2)                 | Loop5<br>x(3,5)-[DRQNG]            | Strand6<br>x-[VLI]-x-[IVLF]-x                                 | Loop6<br>x(5)                 |
| <b>SBA</b> | G-[SKTE]-[VLI]-[TKE]-x(2)                                              | [LFV]-x(2,3)-[ILVM]                 | [DTRE]-[VFI]-x(2)                              | x(2)-[DRNG]                        | x-[VLI]-x-[IVLF]-x                                            | x(5)                          |
| <b>SSS</b> | x(0,3)-[TKE]-x(2)                                                      | x(5,6)                              | x(2,6)                                         | x(1,5)-[GDN]-x(0,2)                | x-[VIL]-x-[IVF]-x(1,5)                                        | x(1,5)                        |
| <b>OCR</b> | x(0,3)-[TKE]-x(2)                                                      | x(5,6)                              | x(2,6)                                         | x(2,8)                             | x-[VIL]-x-[IVF]-x(1,5)                                        | x(1,5)                        |
| <b>MSA</b> | Helix1<br>x-[KRHD]-[TEHG]-x(4)-[GQR]-x(5)-[IVL]-x-[NS]-[MLA]-[FIV]-x-G | Loop7<br>V-[TS]-[EK]-G              | Strand7<br>[WYF]-[EKRTS]-x(2)-[ML]-x-[VLFYI]-x | Loop8<br>x(2)-[HG]-[FY]-[PR]-[MIA] |                                                               |                               |
| <b>SBA</b> | x(0,1)-[KRHD]-[TEHG]-x(4)-[GQR]-x(5)-[IVL]-x-[NS]-[MLA]-[FIV]-x-G      | V-[TS]-[EK]-G                       | [WYF]-[EKRTS]-x(2)-[ML]-x-[VLFYI]-x            | x(2,4)-[PG]-[MIY]                  |                                                               |                               |
| <b>SSS</b> | x-[KRHD]-x-[TEHG]-x(4)-[GRQ]-x(5)-[IVL]-x-[NS]-[MLA]-[FIV]-x-G         | V-[TS]-[EK]-G-x(0,1)                | x(0,1)-[ERKTS]-x(2)-[ML]-x-[VFLYI]-x           | x(2)-[HG]-[FY]-x(0,2)              |                                                               |                               |
| <b>OCR</b> | x(20)                                                                  | x(4,5)                              | x(0,1)-[ERKTS]-x(2)-[ML]-x-[VFLYI]-x           | x(4,6)                             |                                                               |                               |
| <b>MSA</b> | Strand8<br>x(3,5)                                                      | Loop9<br>[GKNE]-[DSKNR]-x(0,4)      | Strand9<br>x(1,3)-[IVL]-x                      | Loop10<br>x(2)-[LV]-G-x-[KS]-x     | Strand10<br>x(4)                                              | Loop11<br>[TDQPE]-x(3)-[DG]-x |
| <b>SBA</b> | [QNR]-x(4)                                                             | [GKNE]-[DSKNR]                      | x-[VIL]-x-[IVL]-[LV]-[ERKST]                   | x(6,8)                             | x(3)-[TDQPE]                                                  | x(3)-[DG]-x                   |
| <b>SSS</b> | x(3,5)                                                                 | x(0,3)-[GN]-x(1,2)                  | x(0,1)-[VIL]-x-[IVL]-x(0,1)                    | x(1,2)-[LV]-G-x-[KS]-x(1,2)        | x(2,5)                                                        | x(2,4)-G-x(0,2)               |
| <b>OCR</b> | x(3,5)                                                                 | x(2,6)                              | x(0,1)-[IVL]-x(0,1)                            | x(6,8)                             | x(2,5)                                                        | x(4,5)                        |
| <b>MSA</b> | Strand11<br>[DTKE]-[VIAF]-x(3,6)                                       | Loop12<br>GKQP]-[EDNT]              | Strand12<br>[ETKR]-[LIV]-x-[VL]-[SDQK]-G       | Loop13<br>x-[DS]                   | Helix2<br>x-[ENQ]-x-[VI]-[GS]-[QRE]-x-[AC]-A-x-[IL]-[ENHQR]-x |                               |
| <b>SBA</b> | [DTKE]-[VIAF]-x(2)-[DSEP]                                              | [GKQST]-[EDNT]                      | [ETKR]-[LIV]-x-[VL]-[SDQK]-G                   | x-[DS]                             | x-[ENQ]-x-[VI]-[GS]-[QRE]-x-[AC]-A-x-[IL]-[ENHQR]-x           |                               |
| <b>SSS</b> | x(0,1)-[DTKE]-[VIAF]-x(1,4)                                            | x(0,4)-[EKQP]-x(0,4)                | [ETKR]-[LIV]-x-[VL]-[SDQK]-G                   | x-[DS]                             | x-[ENQ]-x-[VI]-[GS]-[QRE]-x-[AC]-A-x-[IL]-[ENHQR]-x           |                               |
| <b>OCR</b> | x(0,1)-[DTKE]-[VIAF]-x(1,4)                                            | x(2,7)                              | [ETKR]-[LIV]-x-[VL]-[SDQK]-G                   | x(2)                               | x(13)                                                         |                               |
| <b>MSA</b> | Loop14<br>x(4)-[NKRES]-x(4,8)-[DK]                                     | Strand13<br>G-[VI]-x-[IVY]-x-[RDHG] | Loop15<br>[KE]-x(4)-[DENK]                     |                                    |                                                               |                               |
| <b>SBA</b> | x(9,13)-[DK]                                                           | G-[VI]-x-[IVY]-x-[RDHG]             | x(6,10)                                        |                                    |                                                               |                               |
| <b>SSS</b> | x(4)-[NKRES]-x(2)-[DKH]-x-[RK]-x(0,4)                                  | G-[VI]-x-[IVY]-x(0,5)               | x(1,7)-[NTK]-[REP]-x(0,7)                      |                                    |                                                               |                               |
| <b>OCR</b> | x(11,15)                                                               | G-[VI]-x-[IVY]-x(0,5)               | x(5,16)                                        |                                    |                                                               |                               |



|            |                                                |                                              |                                                                |                                                    |                                             |                                   |
|------------|------------------------------------------------|----------------------------------------------|----------------------------------------------------------------|----------------------------------------------------|---------------------------------------------|-----------------------------------|
| <b>MSA</b> | Strand1<br>x(4)-[AWVF]-x(2)                    | Loop1<br>x(4)                                | Strand2<br>x-[IL]-G                                            | Loop2<br>x-[EDNKQ]-[NG]-x-[ML]-P-W-[NHSPKR]-x(0,2) | Helix1<br>x(2)-[DE]-x(3)-[FY]-[KRSQ]-x(3)   | Loop3<br>x(2,47)-[KND]-x          |
| <b>SBA</b> | x(3)-[ILV]-[AWVC]-A-x                          | x(4)                                         | x-[IL]-G                                                       | x(7,9)                                             | x(2)-[DE]-x(3)-[FY]-[KRSQ]-x(3)             | x-[DGKQ]-[KND]-x                  |
| <b>SSS</b> | x(2,4)-[ILV]-[AWVC]-A-x(1,4)                   | x(3,18)                                      | x(1,3)-[IL]-G-x(0,1)                                           | x(0,1)-[EDNKQ]-x-[ML]-P-W-[NHSPKR]-x(1,4)          | x(1,2)-[DEK]-x(2)-[WLFY]-x(2)-[RKSQ]-x(0,4) | x(4,48)                           |
| <b>OCR</b> | x(3,5)-[AWVC]-x(2,5)                           | x(3,18)                                      | x(1,3)-[IL]-G-x(0,1)                                           | x(9,11)                                            | x(7,12)                                     | x(4,48)                           |
| <b>MSA</b> | Strand3<br>[VIML]-[IV]-[MVL]-G                 | Helix2<br>[RK]-[HNRKST]-[TN]-[WFY]-x-S-[IFM] | Loop4<br>x(0,1)-[GKREQ]-x(0,2)-[RKD]-[PD]-L-[PK]-[GENK]-[RS]-x | Strand4<br>x-[IVL]-[IV]-[LVM]                      |                                             |                                   |
| <b>SBA</b> | [VIML]-[IV]-[MVL]-G                            | [RK]-[HNRKST]-[TN]-[WFY]-x-S-[IFM]           | [GKREQ]-[RKD]-x(2)-[PKG]-x(0,1)-[RS]-x                         | x-[IVL]-[IV]-[LVM]                                 |                                             |                                   |
| <b>SSS</b> | x(0,3)-[VIML]-[IV]-[MVL]-G                     | [RK]-[HNRKST]-[TN]-[WFY]-x(1,3)              | x(1,5)-[RKD]-[PD]L-[PK]-[GENK]-x(0,2)                          | x(0,2)-[IVL]-[IV]-[LVM]                            |                                             |                                   |
| <b>OCR</b> | x(0,3)-[VIML]-[IV]-[MVL]-G                     | x(5,7)                                       | x(6,9)                                                         | x(0,2)-[IVL]-[IV]-[LVM]                            |                                             |                                   |
| <b>MSA</b> | Loop5<br>[ST]-[SRHK]-[QSET]-x-[GDPKTR]-x(5,10) | Strand5<br>x(1,3)                            | Loop6<br>x(0,2)                                                | Helix3<br>x(2,4)-[IVFL]-x                          | Loop7<br>x(3,10)-[DPSK]-x(3)                | Strand6<br>[ILVCA]-[MVFWY]-[VI]   |
| <b>SBA</b> | [ST]-[SRHK]-[QSET]-x(1,2)-[TQDPS]-x(3)-[VAI]   | x(3)                                         | x-[STDN]                                                       | [VLI]-x(3)-[IVFL]-x                                | x(7)                                        | [ILVCA]-[MVFWY]-[VI]              |
| <b>SSS</b> | x(0,5)-[SQE]-x-[PDKTS]-x(4,10)                 | x(3,4)                                       | x(0,1)-[STDN]-x(0,1)                                           | [VLI]-x(3,9)                                       | x(0,3)-[DNEKS]-x(1,2)-[ENK]-x(0,3)          | x(0,3)-[ILVC]-[MVFWY]-[VI]-x(0,2) |
| <b>OCR</b> | x(10,12)                                       | x(3,4)                                       | x(2)                                                           | x(4,10)                                            | x(3,9)                                      | x(0,3)-[ILVC]-[MVFWY]-[VI]-x(0,2) |
| <b>MSA</b> | Loop8<br>[IACV]-G-G                            | Helix4<br>x(2)-[VI]-YF-x(3)                  | Loop9<br>x(5,7)                                                | Strand7<br>[KRT]-[LIWM]-[YLFV]-LVFI-TS-[HRK]-[ILV] | Loop10<br>x(0,8)                            | Strand8<br>x(0,2)                 |
| <b>SBA</b> | [IACV]-G-G                                     | x(2)-[VI]-YF-x(3)                            | x(4,5)                                                         | [KRTQH]-[LIWM]-[YLFV]-LVFI-TS-[HRK]-[ILV]          | x(4)-[EQP]-x-D                              | x(2)                              |
| <b>SSS</b> | x(0,1)-G-x(0,1)                                | x(2)-[VI]-YF-x(3,7)                          | x(1,4)-[QDK]                                                   | x(0,2)-[KRTQH]-[LIWM]-[YLFV]-LVFI-TS-[HRK]-x(0,5)  | x(2,3)-[ETSD]-x(0,6)                        | x(2,3)                            |
| <b>OCR</b> | x(1,3)                                         | x(6,10)                                      | x(2,5)                                                         | x(0,2)-[KRTQH]-[LIWM]-[YLFV]-LVFI-TS-[HRK]-x(0,5)  | x(3,8)                                      | x(2,3)                            |
| <b>MSA</b> | Loop11<br>x(1,2)-[DPE]-[YLIFW]-[ENPD]-x(3)     | Strand9<br>x(4,9)                            | Loop12<br>x(1,52)-[SNTKQG]                                     | Strand10<br>x(2)-[FYL]-x(2)-[LWIFY]-x-[RK]         |                                             |                                   |
| <b>SBA</b> | [FMLY]-x-[DPEK]-x-[ENPD]-x(2)-[DNTKER]         | [WFY]-x(8)                                   | x(1,8)-[SNTKQG]                                                | x(2)-[FYL]-x(2)-[LWIFY]-x-[RK]                     |                                             |                                   |
| <b>SSS</b> | x(0,21)-P-x(0,3)-[DNEQ]-[YWILF]-[EPD]-x(1,10)  | x(5,16)                                      | x(2,9)                                                         | x(1,4)-[FYL]-x(2)-[LWIFY]-x(0,3)                   |                                             |                                   |
| <b>OCR</b> | x(8,38)                                        | x(5,16)                                      | x(2,9)                                                         | x(1,4)-[FYL]-x(2)-[LWIFY]-x(0,3)                   |                                             |                                   |

|            |                                                           |         |                                      |                                       |                                  |                        |                                 |                |
|------------|-----------------------------------------------------------|---------|--------------------------------------|---------------------------------------|----------------------------------|------------------------|---------------------------------|----------------|
|            | Loop1                                                     | Strand1 | Loop2                                | Strand2                               | Loop3                            | Strand3                | Loop4                           | Helix1         |
| <b>MSA</b> | P-E                                                       | I-R     | T-[GMH]-x-[ILFM]-x-[GD]-[SGH]-x(1,4) | [VAI]-x-[LM]                          | x(2)-G-x                         | [TQE]-[LVCF]-x-[IVF]-x | x-[DN]                          | x(0,3)         |
| <b>SBA</b> | P-E                                                       | I-R     | T-x(2)-[ILFM]-x(4,7)                 | [VAI]-x-[LM]                          | x(2)-G-x                         | [TQE]-[LVCF]-x-[IVF]-x | x-[DN]                          | x(0,3)         |
| <b>SSS</b> | P-E                                                       | I-R     | T-x(2)-[ILFM]-x-[GD]-[SGH]-x(0,4)    | x(0,1)-[VAI]-x(1,2)                   | x(2,3)-G-x                       | [TQE]-[LVCF]-x-[IVF]-x | x-[DN]-x(0,1)                   | [NPSE]-[ALV]-x |
| <b>OCR</b> | x(2)                                                      | I-R     | x(7,11)                              | x(0,1)-[VAI]-x(1,2)                   | x(4,5)                           | [TQE]-[LVCF]-x-[IVF]-x | x(2,3)                          | x(3)           |
|            | Loop5                                                     |         |                                      | Helix2                                | Loop6                            |                        | Strand4                         | Loop7          |
| <b>MSA</b> | x(4)-[DNT]-x-[NDET]-x-[LVFI]-x-[LVIC]-[DTS]-Y-[KPQEG]-x   |         |                                      | [ILF]-x-[KRTQN]                       | x-[VL]-[DPRSKEQ]-x-G-[SGN]       |                        | x-[VI]-[YL]-[VIL]               | x-D-G-x        |
| <b>SBA</b> | x(2,4)-[DNT]-x-[NDET]-x-[LVFI]-x-[LVIC]-[DTS]-Y-[KPQEG]-x |         |                                      | [ILF]-x-[KRTQN]                       | x-[VL]-[DPRSKEQ]-x-G-[SGN]       |                        | x-[VI]-[YL]-[VIL]               | x-D-G-x        |
| <b>SSS</b> | x(0,3)-[DNT]-x-[NDET]-x-[LVFI]-x-[IVC]-[DTS]-Y-x(0,2)     |         |                                      | x(0,2)-[ILF]-x(1,3)                   | x(0,2)-[VL]-[DPRSKEQ]-x-G-x(0,1) |                        | x(1,2)-[VI]-[YL]-[VIL]          | x-D-G-x        |
| <b>OCR</b> | x(12,15)                                                  |         |                                      | x(3,4)                                | x(5,7)                           |                        | x(1,2)-[VI]-[YL]-[VIL]          | x(4)           |
|            | Strand5                                                   |         | Loop8                                | Strand6                               | Loop9                            | Strand7                | Loop10                          |                |
| <b>MSA</b> | [IL]-x-[LMV]-x-V-x(2)                                     |         | x-[GED]-x(2,4)                       | x(0,1)-[LV]-x(2)-[EQTKED]-[VAI]-x-N   | [GSNT]                           | x(2)-[LI]              | [GSK]-[SDEN]-[KRN]-[KR]         |                |
| <b>SBA</b> | [IL]-x-[LMV]-x-V-x(2)                                     |         | x-[GDE]-x-[DEQNK]                    | x-[LV]-x(2)-[EQTKD]-[VAI]-x-N         | [GSNT]                           | x(2)-[LI]              | [GSK]-[SDEN]-[KRN]-[KR]         |                |
| <b>SSS</b> | [IL]-x-[LMV]-x-V-x(2,5)                                   |         | x(2,5)                               | x(0,1)-[LV]-x(2)-[EQTKD]-[VAI]-x(0,2) | x(0,2)-[GN]-x(0,1)               | x(2,4)                 | x(0,1)-[SDEN]-[KRN]-[KR]-x(0,1) |                |
| <b>OCR</b> | [IL]-x-[LMV]-x-V-x(2,5)                                   |         | x(2,5)                               | x(0,1)-[LV]-x(2)-[EQTKD]-[VAI]-x(0,2) | x(1,4)                           | x(2,4)                 | x(4,5)                          |                |
|            | Strand8                                                   |         | Loop11                               |                                       |                                  |                        |                                 |                |
| <b>MSA</b> | [GN]-[VM]-N                                               |         | L-P-[GN]-[AC]-x-[VI]-x-L             |                                       |                                  |                        |                                 |                |
| <b>SBA</b> | [GN]-[VM]-N                                               |         | L-P-[GN]-[AC]-x-[VI]-x-L             |                                       |                                  |                        |                                 |                |
| <b>SSS</b> | x(0,1)-[VM]-N                                             |         | L-P-[GN]-[ACV]-x-[VI]-x(2)           |                                       |                                  |                        |                                 |                |
| <b>OCR</b> | x(0,1)-[VM]-N                                             |         | x(8)                                 |                                       |                                  |                        |                                 |                |

**L**

**Figure S2: Distribution of OCR<sup>S</sup> across the protein sequence.** Conserved positions in OCR<sup>S</sup> fingerprints of target dataset, **A-L**, are plotted across the entire protein sequence length for easy visualization. The figure shows conserved positions for following protein folds: **A** GFP-like protein, **B** Cupredoxin-like proteins, **C** Acid Proteases, **D** Ribosomal Protein L14, **E**  $\beta$ -Grasp (Ubiquitin-like) protein, **F** Nucleoside Triphosphate Hydrolase, **G** RNAase A-like proteins, **H** Cysteine Proteinases, **I** 50S Ribosomal Protein L25, **J** 50S Ribosomal Protein L6P, **K** Dihydrofolate reductase-like proteins, **L** Pyruvate kinase N-terminal domain. Conserved residues are not distributed equally across the sequence length but forms multiple conserved blocks.

**A**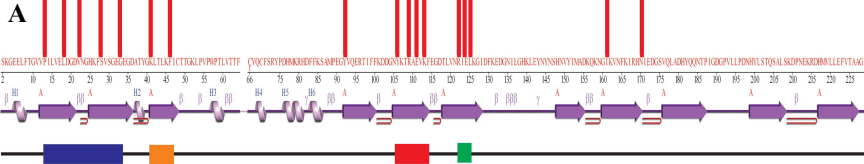

Amino Acid Sequence

[PRKTE]-x(4)-[LVTM]-x(3)-[LVT]-x(5,12)-[SNEKT]-x(4)-[GS]-x(5,7)-[KRTDH]-x(4)-[FTMAL]-x(40,45)-[YFL]-x(13,14)-[YMLAVC]-x(2)-[RKNHTS]-x-[EQRTDS]-x-[KSTER]-x(8,13)-[RSDNHK]-x-[EKTD]-[LCIVF]-x(28,35)-[IVL]-x(8)-[NTQKS]

**B**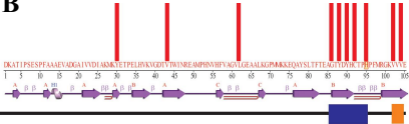

## Amino Acid Sequence

[YF]-x(3,7)-[VI]-x(16,22)-[IVLF]-x(22,38)-G-x-[YF]-x-[YFVLJ]-x-C-x(2,4)-H-x(6,9)-[VIL]-[VICA]

**C**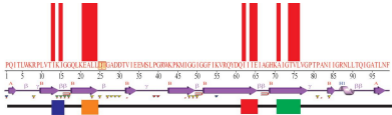

## Amino Acid Sequence

[IVA]-x-[IV]-x(5)-[EKN]-[AVF]-L-L-x(37, 42)-[IV]-x-[IL]-[EK]-x(5, 10)-[AVI]-x(2)-[TSNR]-[VIN]-[LMC]

**D**

MIQQESRLIKYADNSGAREYLVTKYLGSGRKYANIGDYVYATYEDATPGGYVKGQYVKAAYVVRTKIGYERPDGSYTRFDENACVITRDOKSPGTRIFGPVARELRDKDFMKIISLAPEVI

1 5 10 15 20 25 30 35 40 45 50 55 60 65 70 75 80 85 90 95 100 105 110 115 120

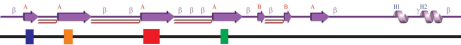

## Amino Acid Sequence

[LIMV]-[KENT]- $\alpha$ (8)-[EKRN]-[VIL]- $\alpha$ (19,23)-[VI]- $\alpha$ -[AIV]-[TS]- $\alpha$ (13,16)[KPEH]-A- $\alpha$ (25)-[IL]

# E

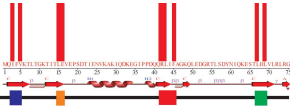

## Amino Acid Sequence

[IL]-x-[VT]-x(8,10)-[LIVF]-[EDNES]-x(25)[RS]-[LF]-x-[FY]-x(21)-[LVT]-x-[LVA]



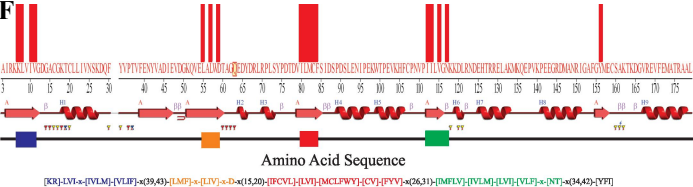

**G**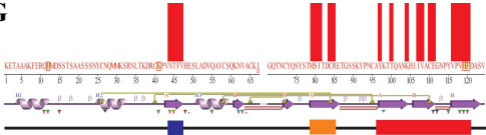

Amino Acid Sequence

N-T-F-[VIL]- $\alpha$ (27,33)-[MFV]-[SQRPT]-[IVL]- $\alpha$ (2)-C-[RTDK]- $\alpha$ (11,13)-Y- $\alpha$ (2)-[TSRK]- $\alpha$ (3)-[KR]- $\alpha$ (2)-[IV]-[VIL]- $\alpha$ -C-[EGD]- $\alpha$ (2,12)[VWL]-P-[VA]-H-[FLY]

# H

LPSYVDNRSAAGAVVDIKS **Q**GECCGQWAFSAIATVEGINKITSGLISLSEQELIDCGRTQNTIGCDGGYITDGFQFIINDGGINTEENTPYTAQDGDQVALQQQKYTIDTYENVPINNEALQTAVTYQPYSVALDAAGDAFKQTASGIFTGPGGTAND **H**AVIVYGYGTEGGNDYWI **V**SWDTTWGEEGYNRI LRNVGGAGTQGLATMPSPYKY

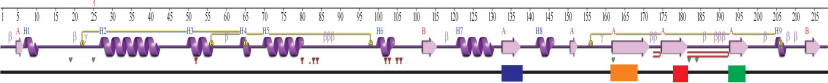

Amino Acid Sequence

[NRQDES]-x(15,19)-[VI]-x(3)-[LVIF]-x(17,24)-**H**-x-[IV]-x-[IAVL]-[VL]-G-x(2,9)-[WTY]-[IL]-[VI]-[KRG]-x(11)-[YF]-x(2)-[DMF]

# I

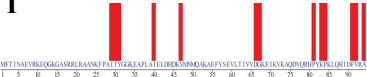

## Amino Acid Sequence

[IV]-[IMA]-Y-x(7,8)-[IVF]-x(6,10)-[VA]-x(12,24)-[DK]-[GA]-x(4,13)-[PK]-x-[KR]-[PR]-x(6)-F-[VFY]-x-[ALV]



**K**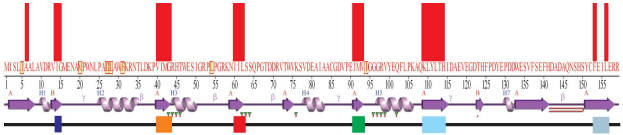

### Amino Acid Sequence

[AWVC]-x(7,24)-[IL]-G-x(25,69)-[VIML]-[IV]-[MVL]-G-x(16,21)-[IVL]-[IV]-[LIVM]-x(28,40)-[ILVC]-[MVFVY]-[VI]-x(15,17)-[KRTQH]-[LIWM]-[YLPV]-[LVPI]-[TS]-[HRK]-x(40,56)-[FYL]-x(2)-[LWFY]

# L

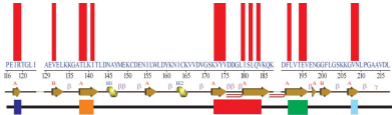

## Amino Acid Sequence

$L-R-x(8,11)-[VAI]-x(6)-[TQ6]-[LVCF]-x-[IVF]-x(28,31)-[VI]-[YL]-[VIL]-x(4)-[IL]-x-[LMV]-x-V-x(7,9)-[LV]-x(2)-[EQTKD]-[VAI]-x(11)-[VM]-N$

**Table S1: Selection of representative Immunoglobulin V-set domain for Alignment**

| Sr. No. | PDB ID | Name                                           | Sequence Length | Sequence identity | rmsd | #Strands (n) |
|---------|--------|------------------------------------------------|-----------------|-------------------|------|--------------|
| 1       | 1g6vK  | Immunoglobulin V-Set Domain                    | 126             | 100               | 0.0  | 13           |
| 2       | 2x1pD  | Gelsolin Nanobody                              | 118             | 68                | 1.3  | 12           |
| 3       | 2cjuH  | Nq16-113.8 Anti-Phox Antibody                  | 121             | 58                | 1.2  | 11           |
| 4       | 1a7oH  | Igg1-Kappa D1.3 Fv (Light Chain)               | 116             | 49                | 1.3  | 11           |
| 5       | 3dv4B  | Antibody Fv Fragment Sag506-01                 | 119             | 58                | 1.4  | 12           |
| 6       | 4kdtA  | Nanobody24                                     | 129             | 74                | 2.0  | 11           |
| 7       | 3p0gB  | Beta-2 Adrenergic Receptor, Lysozyme           | 121             | 76                | 1.1  | 12           |
| 8       | 2ibzX  | Ubiquinol-Cytochrome-C Reductase Complex Core  | 127             | 46                | 1.4  | 11           |
| 9       | 1g9eA  | Antigen-Free Heavy Chain Variable Domain (VHH) | 117             | 75                | 1.9  | 13           |
| 10      | 3lrgA  | Anti-Huntingtin VI Domain                      | 114             | 26                | 1.8  | 11           |

Here, table lists 10 representative Immunoglobulin V-set domain protein structures used for the various alignment approaches. For each candidate, table represents the PDB ID, Sequence length and number of  $\beta$ -strand in structure. Also, sequence and structure deviation w.r.t. first structure, i.e. sequence identity and rmsd are listed for the remaining structural candidates.



**Table S2: Minimization of the OCR<sup>S</sup> fingerprint size for IgV-set domain**

| Sequence Pattern                      | #Hits | TP  | FP  | EFF |
|---------------------------------------|-------|-----|-----|-----|
| OCR <sup>S</sup> (-V <sup>812</sup> ) | 529   | 486 | 43  | 81  |
| OCR <sup>S</sup> (-L <sup>820</sup> ) | 570   | 486 | 84  | 77  |
| OCR <sup>S</sup> (-S <sup>821</sup> ) | 666   | 498 | 168 | 68  |
| OCR <sup>S</sup> (-C <sup>822</sup> ) | 653   | 486 | 167 | 67  |
| OCR <sup>S</sup> (-W <sup>836</sup> ) | 599   | 502 | 97  | 77  |
| OCR <sup>S</sup> (-F <sup>837</sup> ) | 554   | 542 | 12  | 95  |
| OCR <sup>S</sup> (-R <sup>838</sup> ) | 677   | 492 | 185 | 66  |
| OCR <sup>S</sup> (-E <sup>846</sup> ) | 696   | 531 | 185 | 71  |
| OCR <sup>S</sup> (-V <sup>848</sup> ) | 485   | 388 | 97  | 59  |
| OCR <sup>S</sup> (-S <sup>869</sup> ) | 520   | 485 | 35  | 82  |
| OCR <sup>S</sup> (-V <sup>877</sup> ) | 547   | 537 | 35  | 91  |
| OCR <sup>S</sup> (-L <sup>879</sup> ) | 537   | 492 | 45  | 82  |
| OCR <sup>S</sup> (-A <sup>890</sup> ) | 564   | 486 | 78  | 77  |
| OCR <sup>S</sup> (-Y <sup>892</sup> ) | 564   | 486 | 78  | 77  |
| OCR <sup>S</sup> (-C <sup>894</sup> ) | 564   | 486 | 78  | 77  |

Here, table lists the fold detection efficiencies of the fingerprints obtained by eliminating the conserved positions, one at a time, from the OCR<sup>S</sup> fingerprints for immunoglobulin V-set domain. Conserved residues at specific positions are listed using the 1g6vK as representative structure. First column list the conserved position eliminated from the OCR<sup>S</sup> fingerprint. Here, #Hits, TP, FP and EFF indicates total structural hits, true positive hits, false positive hits and fold detection efficiency, respectively.

**Table S3: Database Scan results using various fingerprint for Target Dataset**

| Fold Class and Title                                       | #Fold | MSA |    |     | SBA |    |     | SSS |    |     | OCR |    |     | OCR <sup>S</sup> |     |     | OCR <sup>MIN</sup> |    |     |
|------------------------------------------------------------|-------|-----|----|-----|-----|----|-----|-----|----|-----|-----|----|-----|------------------|-----|-----|--------------------|----|-----|
|                                                            |       | TP  | FP | EFF | TP               | FP  | EFF | TP                 | FP | EFF |
| <b>All beta Proteins</b>                                   |       |     |    |     |     |    |     |     |    |     |     |    |     |                  |     |     |                    |    |     |
| GFP-like protein                                           | 273   | 9   | 0  | 33  | 12  | 0  | 44  | 268 | 0  | 98  | 271 | 0  | 99  | 273              | 0   | 100 | 273                | 0  | 100 |
| Cupredoxin-like proteins                                   | 120   | 0   | 0  | 0   | 29  | 0  | 24  | 42  | 0  | 35  | 117 | 0  | 91  | 120              | 580 | 17  | 120                | 1  | 99  |
| Acid Proteases                                             | 578   | 438 | 0  | 76  | 385 | 0  | 67  | 448 | 0  | 78  | 462 | 0  | 80  | 485              | 0   | 84  | 517                | 0  | 89  |
| Ribosomal Protein L14                                      | 291   | 190 | 8  | 64  | 210 | 10 | 70  | 218 | 8  | 73  | 248 | 8  | 83  | 260              | 8   | 87  | 286                | 26 | 90  |
| <b>Alpha and beta (<math>\alpha+\beta</math>) Proteins</b> |       |     |    |     |     |    |     |     |    |     |     |    |     |                  |     |     |                    |    |     |
| $\beta$ -Grasp (Ubiquitin-like) protein                    | 400   | 235 | 0  | 58  | 249 | 0  | 62  | 284 | 0  | 70  | 302 | 0  | 75  | 363              | 0   | 90  | 363                | 0  | 90  |
| Nucleoside Triphosphate Hydrolase                          | 530   | 180 | 0  | 34  | 248 | 0  | 47  | 304 | 0  | 57  | 482 | 0  | 91  | 492              | 0   | 93  | 517                | 19 | 94  |
| RNAase A-like proteins                                     | 319   | 266 | 0  | 83  | 257 | 0  | 81  | 280 | 0  | 88  | 296 | 0  | 93  | 312              | 0   | 98  | 312                | 0  | 98  |
| Cysteine Proteinases                                       | 198   | 65  | 0  | 33  | 68  | 0  | 34  | 79  | 0  | 40  | 120 | 0  | 61  | 170              | 0   | 86  | 198                | 23 | 90  |
| <b>Alpha and beta (<math>\alpha/\beta</math>) Proteins</b> |       |     |    |     |     |    |     |     |    |     |     |    |     |                  |     |     |                    |    |     |
| 50S Ribosomal Protein L25                                  | 111   | 96  | 0  | 86  | 98  | 0  | 88  | 98  | 0  | 88  | 111 | 4  | 97  | 111              | 208 | 35  | 111                | 4  | 97  |
| 50S Ribosomal Protein L6P                                  | 317   | 181 | 0  | 57  | 197 | 0  | 62  | 235 | 0  | 74  | 256 | 0  | 81  | 282              | 0   | 89  | 312                | 0  | 98  |
| Dihydrofolate reductase-like proteins                      | 272   | 152 | 0  | 56  | 157 | 0  | 57  | 182 | 0  | 67  | 182 | 0  | 67  | 248              | 0   | 91  | 261                | 0  | 96  |
| Pyruvate kinase N-terminal domain                          | 65    | 31  | 0  | 48  | 39  | 0  | 60  | 9   | 0  | 14  | 31  | 0  | 48  | 61               | 0   | 94  | 65                 | 0  | 100 |

Here, table lists the fold detection efficiencies of the respective fingerprints for the target dataset. Here #Fold, TP, FP and EFF indicates total number of homologous structure for each fold, true positive hits, false positive hits and fold detection efficiency, respectively.

**Table S4: Summary of the  $\alpha$ -helical rich protein dataset**

| Fold Class and Title                           | Sequence Length | $\beta$ -Strands |      | $\alpha$ -Helix |        | Loop #res | Min SEQ ID | #FOLD |
|------------------------------------------------|-----------------|------------------|------|-----------------|--------|-----------|------------|-------|
|                                                |                 | #Strand          | #res | #Helix          | #res   |           |            |       |
| <b><math>\alpha</math>-helix rich Proteins</b> |                 |                  |      |                 |        |           |            |       |
| Globin-like proteins                           | 131~172         | 0                | 0    | 6~9             | 91~104 | ~50       | 14         | 997   |
| Nuclear Receptor Ligand Binding Domain         | 211~249         | 2                | 6    | 11~12           | ~143   | ~70       | 16         | 548   |
| GST C-terminal domain                          | 143~150         | 2                | 4    | 7~8             | ~125   | ~25       | 25         | 45    |
| Ribosomal Protein S7                           | 139~155         | 4                | 12   | 6               | 87     | ~40       | 42         | 220   |

Here, table lists the 4  $\alpha$ -helical rich structurally similar sequence dissimilar fold used in the study. Fold class and title is listed in first column, second column shows the sequence length of representative structures of each fold. For each fold, secondary structure elements information, i.e. total number of residues involved in strand, helix and loop, are listed. Here, #Fold indicates the total number of structural homologs present in the PDB.

**Table S5: Database Scan results using various fingerprint for  $\alpha$ -helical rich protein**

| Fold Class and Title                           | MSA  |     | SBA  |     | OCR  |     | OCR <sup>H</sup> |     | OCR <sup>MIN</sup> |     |
|------------------------------------------------|------|-----|------|-----|------|-----|------------------|-----|--------------------|-----|
|                                                | %res | EFF | %res | EFF | %res | EFF | %res             | EFF | %res               | EFF |
| <b><math>\alpha</math>-helix rich Proteins</b> |      |     |      |     |      |     |                  |     |                    |     |
| Globin-like proteins                           | 22   | 52  | 26   | 52  | 21   | 52  | 16               | 75  | 9                  | 82  |
| Nuclear Receptor Ligand Binding Domain         | 32   | 69  | 30   | 69  | 27   | 76  | 21               | 96  | 7                  | 100 |
| GST C-terminal domain                          | 27   | 44  | 25   | 64  | 25   | 64  | 20               | 80  | 6                  | 98  |
| Ribosomal Protein S7                           | 58   | 96  | 50   | 92  | 47   | 96  | 35               | 96  | 7                  | 100 |

Here, table lists the percentage of the sequence residues involved in the generated fingerprints as well as the fold detection efficiencies of the respective fingerprints for the dataset of 4  $\alpha$ -helical rich protein. Here %res indicates percentage of the conserved positions used to generate each fingerprints and EFF indicates the fold detection efficiency.

**Table S6: Selection of representative Green Fluorescent Proteins for Alignment**

| Sr. No. | PDB ID | Name                                                                      | Sequence Length | Sequence identity | rmsd | #Strands (n) |
|---------|--------|---------------------------------------------------------------------------|-----------------|-------------------|------|--------------|
| 1       | 1emaA  | GFP from <i>Aequorea victoria</i> , Q80R                                  | 229             | 100               | 0.0  | 11           |
| 2       | 3u0mA  | Fluorescent protein mRuby                                                 | 232             | 28                | 1.6  | 11           |
| 3       | 2dd7A  | GFP from marine copepod <i>Chiridius poppei</i>                           | 218             | 17                | 1.6  | 11           |
| 4       | 1xqmA  | Kindling Fluorescent Protein                                              | 232             | 22                | 1.8  | 11           |
| 5       | 2wisB  | Killer-red from <i>Anthomedusae sp</i>                                    | 259             | 25                | 1.3  | 11           |
| 6       | 2rh7B  | GFP from <i>Renilla reniformis</i>                                        | 241             | 22                | 1.5  | 11           |
| 7       | 1g7kA  | Fluorescent Protein FP583 from <i>Discosoma genus</i>                     | 236             | 23                | 1.5  | 11           |
| 8       | 2g6xB  | green fluorescent protein from marine copepod <i>Pontellina plumata</i>   | 219             | 18.9              | 1.6  | 11           |
| 9       | 2p4mA  | GFP-like non-fluorescent chromoprotein from <i>Montipora efflorescens</i> | 221             | 23                | 1.7  | 11           |
| 10      | 3cfaA  | GFP-like Fluorescent Protein from <i>Anemonia sulcata</i>                 | 169             | 18                | 1.8  | 8            |

Here, table lists 10 representative Green Fluorescent Protein structures used for the various alignment approaches. For each candidate, table represents the PDB ID, Sequence length and number of  $\beta$ -strand in structure. Also, sequence and structure deviation w.r.t. first structure, i.e. sequence identity and rmsd are listed for the remaining structural candidates.

**Table S7: Multiple sequence alignment of GFP-like proteins using ClustalW**

| PDB-ID | Strand |   |   |   |   |   |   |   |   |   | Loop | Strand2 |   |   |   |   |   |   |   |   |   | Loop |   |   |   |   |   |   |   |
|--------|--------|---|---|---|---|---|---|---|---|---|------|---------|---|---|---|---|---|---|---|---|---|------|---|---|---|---|---|---|---|
| 1EMA   | V      | P | I | L | V | E | L | D | G | D | V    | N       | G | H | K | F | S | V | S | G | E | G    | E | G | D | A | T | Y | G |
| 3U0M   | M      | R | M | K | V | V | L | V | A | S | V    | N       | G | H | Q | R | K | C | T | G | E | G    | E | N | G | P | Y | M | G |
| 2DD7   | F      | K | I | E | S | R | I | H | G | N | L    | N       | G | E | K | F | E | L | V | G | G | G    | V | G | - | - | E | E | G |
| 1XQM   | M      | P | F | K | T | T | I | E | G | T | V    | N       | G | H | C | F | K | C | I | G | K | G    | E | G | N | P | F | E | G |
| 2WIS   | M      | T | F | K | I | F | I | D | G | E | V    | N       | G | Q | K | F | T | I | V | A | D | G    | S | S | K | F | P | H | G |
| 2RH7   | M      | P | T | K | I | N | L | E | G | L | V    | G       | D | H | A | F | S | M | E | G | V | G    | E | G | N | I | L | E | G |
| 1G7K   | M      | R | F | K | V | R | M | E | G | T | V    | N       | G | H | E | F | E | I | E | G | E | G    | E | G | R | P | Y | E | G |
| 2G6X   | M      | E | I | E | C | R | I | T | G | T | L    | N       | G | V | E | F | E | L | V | G | G | G    | E | G | T | P | E | Q | G |
| 2P4M   | -      | - | - | - | - | - | - | - | - | - | -    | -       | - | - | - | - | - | - | - | - | - | -    | - | - | - | - | - | - |   |
| 3CFA   | M      | T | Y | K | V | Y | M | S | G | T | V    | N       | G | H | Y | F | E | V | E | G | D | G    | K | G | K | P | Y | E | G |

| PDB-ID | Strand3 |   |   |   |   |   |   |   | Loop |   |   |   |   |   |   |   |   |   |     |   |   |   |   |   |   |   |   |   |   |   |   |
|--------|---------|---|---|---|---|---|---|---|------|---|---|---|---|---|---|---|---|---|-----|---|---|---|---|---|---|---|---|---|---|---|---|
| 1EMA   | K       | L | T | L | K | F | I | C | T    | T | G | - | K | L | P | V | P | W | P   | T | L | V | T | T | F | G | Y | G | V | Q | C |
| 3U0M   | T       | Q | T | M | R | I | K | V | G    | S | S | - | Q | V | P | V | V | F | ... | Y | V | V | M | N | H | G | R | S | Y | T | A |
| 2DD7   | R       | L | E | I | E | M | K | T | K    | D | K | - | P | L | A | F | S | P | F   | L | L | S | H | C | M | G | Y | G | F | Y | H |
| 1XQM   | T       | Q | E | M | K | I | E | V | I    | E | G | G | P | L | P | F | A | F | H   | I | L | S | T | S | C | M | Y | G | S | K | T |
| 2WIS   | D       | F | N | V | H | A | V | C | E    | T | G | - | K | L | P | M | S | W | K   | P | I | C | H | L | I | Q | Y | G | E | P | F |
| 2RH7   | T       | Q | E | V | K | I | S | V | T    | K | G | A | P | L | P | F | A | F | D   | I | V | S | V | A | F | G | Y | G | N | R | A |
| 1G7K   | H       | N | T | V | K | L | K | V | T    | K | G | G | P | L | P | F | A | W | D   | I | L | S | P | Q | F | Q | Y | G | S | K | V |
| 2G6X   | R       | M | T | N | K | M | K | S | T    | K | G | - | A | L | T | F | S | P | Y   | L | L | S | H | V | M | G | Y | G | F | Y | H |
| 2P4M   | -       | - | - | - | - | - | - | - | -    | - | - | - | - | - | - | - | - | - | -   | - | - | - | - | - | - | - | - | - | - | - | - |
| 3CFA   | E       | Q | T | V | K | L | T | V | T    | K | G | G | P | L | P | F | A | W | D   | I | L | S | P | Q | C | Q | Y | G | S | I | P |

| PDB-ID | Loop |   |   |   |   |   |   |   |   |   |   |   |   |   |   |   |   |   | Strand4 |   |   |   |   |   |   |   |   |   |   |   |   |
|--------|------|---|---|---|---|---|---|---|---|---|---|---|---|---|---|---|---|---|---------|---|---|---|---|---|---|---|---|---|---|---|---|
| 1EMA   | F    | S | R | Y | P | D | H | M | K | R | H | D | F | F | K | S | A | M | P       | E | G | - | Y | V | Q | E | R | T | I | F | F |
| 3U0M   | I    | S | T | I | P | E | T | V | G | - | Y | S | L | L | P | L | A | P | I       | G | G | I | F | T | W | M | F | V | T | R | Q |
| 2DD7   | F    | A | S | F | P | K | G | T | K | - | - | N | I | Y | L | H | A | A | T       | N | G | G | Y | T | N | T | R | K | E | I | Y |
| 1XQM   | F    | I | K | Y | V | S | G | I | P | - | - | D | Y | F | K | Q | S | F | P       | E | G | - | F | T | W | E | R | T | T | T | Y |
| 2WIS   | F    | A | R | Y | P | D | G | I | S | - | - | H | F | A | Q | E | C | F | P       | E | G | - | L | S | I | D | R | T | V | R | F |
| 2RH7   | Y    | T | G | Y | P | E | E | I | S | - | - | D | Y | F | L | Q | S | F | P       | E | G | - | F | T | Y | E | R | N | I | R | Y |
| 1G7K   | Y    | V | K | H | P | A | D | I | P | - | - | D | Y | K | K | L | S | F | P       | E | G | - | F | K | W | E | R | V | M | N | F |
| 2G6X   | F    | G | T | Y | P | S | G | Y | E | - | - | N | P | F | L | H | A | I | N       | N | G | G | Y | T | N | T | R | I | E | K | Y |
| 2P4M   | F    | I | K | Y | V | S | G | I | P | - | - | D | Y | F | K | Q | S | F | P       | E | G | - | F | T | W | E | R | T | T | T | Y |
| 3CFA   | F    | T | K | Y | P | E | D | I | P | - | - | D | Y | V | K | Q | S | F | P       | E | G | - | F | T | W | E | R | I | M | N | F |

| PDB-ID | Loop |     |   |   |   | Strand5 |   |   |   |   |   |   |   |   |   | Loop |   | Strand6 |   |   |   |   |   |   |   |   |   |   |   |
|--------|------|-----|---|---|---|---------|---|---|---|---|---|---|---|---|---|------|---|---------|---|---|---|---|---|---|---|---|---|---|---|
| 1EMA   | K    | -   | D | D | G | N       | Y | K | T | R | A | E | V | K | F | E    | G | D       | T | L | V | N | R | I | E | L | K | G | I |
| 3U0M   | E    | ... | D | G | G | V       | I | T | V | Q | Q | D | T | S | L | L    | D | G       | C | L | V | Y | H | Q | Q | V | R | G | V |
| 2DD7   | E    | -   | D | G | G | I       | L | E | V | N | F | R | Y | T | Y | E    | F | N       | K | I | I | G | D | V | E | C | I | G | H |
| 1XQM   | E    | -   | D | G | G | F       | L | T | A | H | Q | D | T | S | L | D    | G | D       | C | L | V | Y | K | V | K | I | L | G | N |
| 2WIS   | E    | -   | N | D | G | T       | M | T | S | H | H | T | Y | E | L | D    | D | T       | C | V | V | S | R | I | T | V | N | C | D |
| 2RH7   | Q    | -   | D | G | G | T       | A | I | V | K | S | D | I | S | L | E    | D | G       | K | F | I | V | N | V | D | F | K | A | K |
| 1G7K   | E    | -   | D | G | G | V       | V | T | V | T | Q | D | S | S | L | Q    | D | G       | C | F | I | Y | K | V | K | F | I | G | V |
| 2G6X   | E    | -   | D | G | G | V       | L | H | V | S | F | S | Y | R | Y | E    | A | G       | R | V | I | G | D | F | K | V | M | G | T |
| 2P4M   | E    | -   | D | G | G | F       | L | T | A | H | Q | D | T | S | L | D    | G | D       | C | L | V | Y | K | V | K | I | L | G | N |
| 3CFA   | E    | -   | D | G | A | V       | C | T | V | S | N | D | S | S | I | Q    | G | N       | C | F | T | Y | H | V | K | F | S | G | L |

| PDB-ID | Loop |   |   |     |   |   |   |   |   |   |   |   |   |   |   | Strand7 |   |   |   |   |   |   |   | Loop |   |   |   |   |
|--------|------|---|---|-----|---|---|---|---|---|---|---|---|---|---|---|---------|---|---|---|---|---|---|---|------|---|---|---|---|
| 1EMA   | D    | F | K | E   | D | G | N | I | L | G | H | K | L | E | Y | ...     | S | H | N | V | Y | I | M | A    | D | K | Q | K |
| 3U0M   | P    | S | N | ... | E | G | A | V | M | Q | I | K | T | K | G | ...     | N | R | G | Y | T | H | M | A    | L | D | G | G |
| 2DD7   | G    | F | P | S   | Q | S | P | I | F | K | D | T | I | V | K | S       | C | P | T | V | D | L | M | L    | P | M | S | G |
| 1XQM   | N    | F | P | A   | D | G | P | V | M | Q | N | K | V | G | R | W       | E | P | G | T | E | I | V | Y    | E | V | D | G |
| 2WIS   | G    | F | Q | P   | D | G | P | I | M | R | D | Q | L | V | D | I       | L | P | N | E | T | H | M | F    | P | H | G | P |
| 2RH7   | D    | L | R | R   | M | G | P | V | M | Q | Q | D | I | V | G | M       | Q | P | S | Y | E | S | M | Y    | T | N | V | T |
| 1G7K   | N    | F | P | S   | D | G | P | V | M | Q | K | K | T | M | G | W       | E | A | S | T | E | R | L | Y    | P | R | D | G |
| 2G6X   | G    | F | P | E   | D | S | V | I | F | T | D | K | I | I | R | S       | N | A | T | V | E | H | L | H    | P | M | G | D |
| 2P4M   | N    | F | P | A   | D | G | P | V | M | Q | N | K | A | G | G | W       | E | P | S | C | E | I | L | Y    | E | V | D | G |
| 3CFA   | N    | F | P | P   | N | G | P | V | M | Q | K | K | T | Q | G | W       | E | P | S | S | E | R | L | F    | A | R | G | G |

| PDB-ID | Strand8 |   |   |   |   |   |   |   |   |   | Loop |   |   |   |   | Strand9 |   |   |   |   |   |   |   |   |   |   |   |   |
|--------|---------|---|---|---|---|---|---|---|---|---|------|---|---|---|---|---------|---|---|---|---|---|---|---|---|---|---|---|---|
| 1EMA   | G       | I | K | V | N | F | K | I | R | H | N    | I | E | D | G | S       | V | Q | L | A | D | H | Y | Q | Q | N | T | P |
| 3U0M   | G       | L | G | R | Y | F | V | T | T | Y | R    | K | M | P | G | ...     | G | H | P | S | H | T | H | I | Y | Q | W | R |
| 2DD7   | I       | I | A | S | S | Y | A | R | A | F | Q    | L | K | D | G | ...     | A | E | V | K | N | N | I | D | F | K | N | P |
| 1XQM   | V       | L | R | G | Q | S | L | M | A | L | K    | C | P | G | G | ...     | C | H | L | H | T | T | Y | R | S | K | K | P |
| 2WIS   | A       | V | R | Q | L | A | F | I | G | F | T    | T | A | D | G | ...     | G | H | F | D | S | K | M | T | F | N | G | S |
| 2RH7   | S       | V | I | G | E | C | I | I | A | F | K    | L | Q | T | G | ...     | Y | H | M | R | T | V | Y | K | S | K | K | P |
| 1G7K   | V       | L | K | G | E | I | H | K | A | L | K    | L | K | D | G | ...     | V | E | F | K | S | I | Y | M | A | K | K | P |
| 2G6X   | D       | L | D | G | S | F | T | R | T | F | S    | L | R | D | G | ...     | S | V | V | D | S | H | M | H | F | K | S | A |
| 2P4M   | V       | L | C | G | Q | S | L | M | A | L | K    | C | P | G | G | ...     | C | R | L | H | T | T | Y | R | S | K | K | P |
| 3CFA   | M       | L | I | G | N | N | F | M | A | L | K    | L | E | G | G | ...     | C | E | F | K | T | T | Y | K | A | K | K | P |

| PDB-ID | Loop |     |   |   |   |   |   |   |   |   | Strand10 |   |   |   |   |   |   |   |   |   | Loop |   |   |   |   |   |   |   |
|--------|------|-----|---|---|---|---|---|---|---|---|----------|---|---|---|---|---|---|---|---|---|------|---|---|---|---|---|---|---|
| 1EMA   | I    | ... | G | P | V | L | L | P | D | N | H        | Y | L | S | T | Q | S | A | L | S | K    | D | P | N | E | K | R | D |
| 3U0M   | K    | ... | T | V | G | N | I | A | H | D | H        | A | V | S | H | R | L | E | R | L | -    | - | S | V | N | E | M | - |
| 2DD7   | I    | -   | S | F | S | K | S | G | - | P | M        | F | T | H | R | R | V | E | E | T | H    | T | K | E | N | L | A | M |
| 1XQM   | A    | -   | S | A | L | K | M | P | G | F | H        | F | E | D | H | R | I | E | I | M | E    | E | V | E | K | G | K | C |
| 2WIS   | R    | -   | - | A | I | E | I | P | G | P | H        | F | V | T | I | I | T | K | Q | M | R    | D | T | S | D | K | R | D |
| 2RH7   | -    | -   | - | V | E | T | M | P | L | Y | H        | F | I | Q | H | R | L | V | K | T | N    | V | D | T | A | S | G | Y |
| 1G7K   | -    | -   | - | - | V | Q | L | P | G | Y | Y        | Y | V | D | S | K | L | D | I | T | S    | H | N | E | D | Y | T | I |
| 2G6X   | I    | ... | S | I | L | Q | N | G | G | P | M        | F | A | F | R | R | V | E | E | D | H    | S | N | T | E | L | G | I |
| 2P4M   | A    | -   | S | A | L | K | M | P | E | F | H        | F | E | D | H | R | I | E | V | K | -    | E | V | Q | K | G | K | H |
| 3CFA   | -    | -   | - | - | V | K | M | P | G | Y | H        | Y | V | D | R | K | L | D | V | T | N    | H | N | K | D | Y | T | S |

| PDB-ID | Strand11 |   |   |   |   |   |   |   |   |   |   |
|--------|----------|---|---|---|---|---|---|---|---|---|---|
| 1EMA   | H        | M | V | L | L | E | F | V | T | A | A |
| 3U0M   | F        | V | V | Q | R | E | H | A | V | A | K |
| 2DD7   | V        | E | Y | Q | Q | V | F | N | S | A | P |
| 1XQM   | Y        | K | Q | Y | E | A | A | V | G | R | Y |
| 2WIS   | H        | V | C | Q | R | E | V | A | Y | A | H |
| 2RH7   | V        | V | Q | H | E | T | A | I | A | A | H |
| 1G7K   | V        | E | Q | Y | E | R | T | E | G | R | H |
| 2G6X   | V        | E | Y | Q | H | A | F | K | T | P | D |
| 2P4M   | Y        | E | Q | Y | E | A | A | V | A | R | Y |
| 3CFA   | V        | E | Q | C | E | I | S | I | A | R | K |

Here, PDB code of proteins is provided in the first column, chain name – in the 2nd column ('chain'), and the beginning and end position of each sequence in a domain – in the 3rd and 4th ('start' and 'end') columns, respectively. The sequences of the longer loops are not shown in their entirety, and the 'skipped' segments of loops are indicated by ellipses ("..."). The spaces within the sequences separate between secondary-structure units (strands and loops). The conserved hydrophobic and hydrophilic positions are shown in blue and green respectively.



**Table S8: Structure based sequence alignment of GFP-like proteins using Dali server**

| PDB-ID | Chain | Start | End | Strand1 |   |   |   |   |   |   |   |   |   |   | Loop |   | Strand2 |   |   |   |   |   |   |   |   |   |   |   |
|--------|-------|-------|-----|---------|---|---|---|---|---|---|---|---|---|---|------|---|---------|---|---|---|---|---|---|---|---|---|---|---|
| 1EMA   | A     | 12    | 227 | V       | P | I | L | V | E | L | D | G | D | V | N    | G | H       | K | F | S | V | S | G | E | G | E | G | D |
| 3U0M   | A     | 4     | 222 | M       | R | M | K | V | V | L | E | G | S | V | F    | G | H       | Q | F | K | C | T | G | E | G | E | V | N |
| 2DD7   | A     | 4     | 212 | F       | K | I | E | S | R | I | H | G | N | L | N    | G | E       | K | F | E | L | V | G | G | G | V | G | E |
| 1XQM   | A     | 9     | 220 | M       | P | F | K | T | T | I | E | G | T | V | N    | G | H       | C | F | K | C | I | G | K | G | E | G | N |
| 2WIS   | B     | 12    | 223 | M       | T | F | K | I | F | I | D | G | E | V | N    | G | Q       | K | F | T | I | V | A | D | G | S | S | K |
| 2RH7   | B     | 11    | 221 | M       | P | T | K | I | N | L | E | G | L | V | G    | D | H       | A | F | S | M | E | G | V | G | E | G | N |
| 1G7K   | A     | 12    | 220 | M       | R | F | K | V | R | M | E | G | T | V | N    | G | H       | E | F | E | I | E | G | E | G | E | G | R |
| 2G6X   | B     | 4     | 215 | M       | E | I | E | C | R | I | T | G | T | L | N    | G | V       | E | F | E | L | V | G | G | G | E | G | T |
| 2P4M   | A     | 12    | 220 | -       | - | - | - | - | - | - | - | - | - | - | -    | - | -       | - | - | - | - | - | - | - | - | - | - |   |
| 3CFA   | A     | 88    | 219 | M       | T | Y | K | V | Y | M | S | G | T | V | N    | G | H       | Y | F | E | V | E | G | D | G | K | G | K |

| PDB-ID | Loop |   |   |   | Strand3 |   |   |   |   |   |   |   | Loop |   |   |   |   |   |   |   |   |   |   |   |   |   |   |   |   |   |
|--------|------|---|---|---|---------|---|---|---|---|---|---|---|------|---|---|---|---|---|---|---|---|---|---|---|---|---|---|---|---|---|
| 1EMA   | A    | T | Y | G | K       | L | T | L | K | F | I | C | ...  | L | P | V | P | W | P | T | L | V | T | T | F | V | Q | C | F | S |
| 3U0M   | P    | Y | M | G | T       | Q | Y | M | A | I | K | V | ...  | P | L | - | P | F | A | F | A | V | D | I | L | A | T | S | F | M |
| 2DD7   | E    | - | - | G | R       | L | E | I | E | M | K | T | ...  | L | A | F | S | P | F | L | L | S | H | C | M | F | Y | H | F | A |
| 1XQM   | P    | F | E | G | T       | Q | E | M | K | I | E | V | ...  | L | P | F | A | F | H | I | L | S | T | S | C | S | K | T | F | I |
| 2WIS   | F    | P | H | G | D       | F | N | V | H | A | V | C | ...  | L | P | M | S | W | K | P | I | C | H | L | I | E | P | F | F | A |
| 2RH7   | I    | L | E | G | T       | Q | E | V | K | I | S | V | ...  | L | P | F | A | F | D | I | V | S | V | A | F | N | R | A | Y | T |
| 1G7K   | P    | Y | E | G | H       | N | T | V | K | L | K | V | ...  | L | P | F | A | W | D | I | L | S | P | Q | F | S | K | V | Y | V |
| 2G6X   | P    | E | Q | G | R       | M | T | N | K | M | K | S | ...  | L | T | F | S | P | Y | L | L | S | H | V | M | F | Y | H | F | G |
| 2P4M   | -    | - | - | - | -       | - | - | - | - | - | - | - | ...  | - | - | - | - | - | - | - | - | - | - | - | - | S | K | T | F | I |
| 3CFA   | P    | Y | E | G | E       | Q | T | V | K | L | T | V | ...  | L | P | F | A | W | D | I | L | S | P | Q | C | S | I | P | F | T |

| PDB-ID |   |   |   |   |   |   |     |   |   |   |   |   |   | Strand4 |   |   |   |   |   |   |   |   |   |   | Loop |   |   |   |   |   |
|--------|---|---|---|---|---|---|-----|---|---|---|---|---|---|---------|---|---|---|---|---|---|---|---|---|---|------|---|---|---|---|---|
| 1EMA   | R | Y | P | D | H | M | ... | D | F | F | K | S | A | M       | P | E | G | Y | V | Q | E | R | T | I | F    | F | K | D | D | G |
| 3U0M   | V | R | T | F | K | Y | -   | K | G | G | P | D | F | G       | G | - | E | F | T | W | E | A | V | T | R    | Y | L | D | G | G |
| 2DD7   | S | F | P | K | G | T | ... | N | I | Y | L | H | A | A       | T | G | G | Y | T | N | T | R | K | E | I    | Y | E | D | G | G |
| 1XQM   | K | Y | V | S | G | I | ... | D | Y | F | K | Q | S | F       | P | E | G | F | T | W | E | R | T | T | T    | Y | E | D | G | G |
| 2WIS   | R | Y | P | D | G | I | ... | H | F | A | Q | E | C | F       | P | E | G | L | S | I | D | R | T | V | R    | F | E | N | D | G |
| 2RH7   | G | Y | P | E | E | I | ... | D | Y | F | L | Q | S | F       | P | E | G | F | T | Y | E | R | N | I | R    | Y | Q | D | G | G |
| 1G7K   | K | H | P | A | D | I | ... | D | Y | K | K | L | S | F       | P | E | G | F | K | W | E | R | V | M | N    | F | E | D | G | G |
| 2G6X   | T | Y | P | S | G | Y | ... | N | P | F | L | H | A | I       | N | G | G | Y | T | N | T | R | I | E | K    | Y | E | D | G | G |
| 2P4M   | K | Y | V | S | G | I | ... | D | Y | F | K | Q | S | F       | P | E | G | F | T | W | E | R | T | T | T    | Y | E | D | G | G |
| 3CFA   | K | Y | P | E | D | I | ... | D | Y | V | K | Q | S | F       | P | E | G | F | T | W | E | R | I | M | N    | F | E | D | G | A |

| PDB-ID | Strand5 |   |   |   |   |   |   |   |   |   | Loop |   | Strand6 |   |   |   |   |   |   |   |   |   | Loop |   |     |   |   |   |   |
|--------|---------|---|---|---|---|---|---|---|---|---|------|---|---------|---|---|---|---|---|---|---|---|---|------|---|-----|---|---|---|---|
| 1EMA   | N       | Y | K | T | R | A | E | V | K | F | E    | G | D       | T | L | V | N | R | I | E | L | K | G    | I | ... | L | G | H | K |
| 3U0M   | V       | I | T | V | K | Q | D | T | S | G | I    | D | G       | C | L | V | Y | H | T | Q | V | R | G    | V | ... | N | F | P | - |
| 2DD7   | I       | L | E | V | N | F | R | Y | T | Y | E    | F | N       | K | I | I | G | D | V | E | C | I | G    | H | ... | F | K | D | T |
| 1XQM   | F       | L | T | A | H | Q | D | T | S | L | D    | G | D       | C | L | V | Y | K | V | K | I | L | G    | N | ... | M | Q | N | K |
| 2WIS   | T       | M | T | S | H | H | T | Y | E | L | D    | D | T       | C | V | V | S | R | I | T | V | N | C    | D | ... | M | R | D | Q |
| 2RH7   | T       | A | I | V | K | S | D | I | S | L | E    | D | G       | K | F | I | V | N | V | D | F | K | A    | K | ... | M | Q | Q | D |
| 1G7K   | V       | V | T | V | T | Q | D | S | S | L | Q    | D | G       | C | F | I | Y | K | V | K | F | I | G    | V | ... | M | Q | K | K |
| 2G6X   | V       | L | H | V | S | F | S | Y | R | Y | E    | A | G       | R | V | I | G | D | F | K | V | M | G    | T | ... | F | T | D | K |
| 2P4M   | F       | L | T | A | H | Q | D | T | S | L | D    | G | D       | M | L | V | Y | K | V | K | I | L | G    | N | ... | M | Q | N | K |
| 3CFA   | V       | C | T | V | S | N | D | S | S | I | Q    | G | N       | C | F | T | N | R | I | E | L | K | G    | I | ... | L | G | H | K |

| PDB-ID | Loop |   |   |   |   |   | Strand7 |   |   |   |   |   | Loop |   |   | Strand8 |     |   |   |   |   |   |   |   |   |   |   |   |   |
|--------|------|---|---|---|---|---|---------|---|---|---|---|---|------|---|---|---------|-----|---|---|---|---|---|---|---|---|---|---|---|---|
| 1EMA   | L    | E | Y | N | Y | N | S       | H | N | V | Y | I | M    | A | D | K       | ... | N | G | I | K | V | N | F | K | I | R | H | N |
| 3U0M   | -    | S | N | G | A | V | M       | Y | T | E | M | M | H    | P | A | D       | -   | G | G | L | R | G | Y | T | H | M | A | L | K |
| 2DD7   | I    | V | - | K | S | C | P       | T | V | D | L | M | L    | P | M | S       | ... | N | I | I | A | S | S | Y | A | R | A | F | Q |
| 1XQM   | V    | G | - | R | W | E | P       | G | T | E | I | V | Y    | E | V | D       | -   | G | V | L | R | G | Q | S | L | M | A | L | K |
| 2WIS   | L    | V | - | D | I | L | P       | N | E | T | H | M | F    | P | H | G       | ... | N | A | V | R | Q | L | A | F | I | G | F | T |
| 2RH7   | I    | V | - | G | M | Q | P       | S | Y | E | S | M | Y    | T | N | V       | -   | T | S | V | I | G | E | C | I | I | A | F | K |
| 1G7K   | T    | M | - | G | W | E | A       | S | T | E | R | L | Y    | P | R | D       | -   | G | V | L | K | G | E | I | H | K | A | L | K |
| 2G6X   | I    | I | - | R | S | N | A       | T | V | E | H | L | H    | P | M | G       | ... | N | D | L | D | G | S | F | T | R | T | F | S |
| 2P4M   | A    | G | - | G | W | E | P       | S | C | E | I | L | Y    | E | V | D       | -   | G | V | L | C | G | Q | S | L | M | A | L | K |
| 3CFA   | L    | E | Y | N | Y | N | S       | H | N | V | R | L | F    | A | R | G       | -   | G | M | L | I | G | N | N | F | M | A | L | K |

| PDB-ID | Loop |   |   |   |   | Strand9 |   |   |   |   |   |   |   |   |   | Loop |   |   |   |   |   |   |   |   |   |   |   |   |
|--------|------|---|---|---|---|---------|---|---|---|---|---|---|---|---|---|------|---|---|---|---|---|---|---|---|---|---|---|---|
| 1EMA   | I    | E | D | G | S | V       | Q | L | A | D | H | Y | Q | Q | N | T    | P | I | G | D | G | P | V | L | L | P | D | N |
| 3U0M   | V    | D | G | G | G | G       | H | L | S | C | S | F | Q | T | T | Y    | R | - | K | T | V | G | - | - | N | I | K | M |
| 2DD7   | L    | K | D | G | S | F       | Y | T | A | E | V | K | N | N | I | D    | F | K | - | - | N | P | I | H | S | G | - | P |
| 1XQM   | C    | P | G | G | R | H       | L | T | C | H | L | H | T | T | Y | R    | S | K | K | P | S | A | L | K | M | P | G | F |
| 2WIS   | T    | A | D | G | G | L       | M | M | G | H | F | D | S | K | M | T    | F | N | G | S | R | A | I | E | I | P | G | P |
| 2RH7   | L    | Q | T | G | K | H       | F | T | Y | H | M | R | T | V | Y | K    | S | K | K | - | P | V | E | T | M | P | L | Y |
| 1G7K   | L    | K | D | G | G | H       | Y | L | V | E | F | K | S | I | Y | M    | A | K | K | - | - | P | V | Q | L | P | G | Y |
| 2G6X   | L    | R | D | G | G | Y       | Y | S | S | V | V | D | S | H | M | H    | F | K | S | - | - | A | I | H | N | G | G | P |
| 2P4M   | C    | P | G | G | R | H       | L | N | C | R | L | H | T | T | Y | R    | S | K | K | P | S | A | L | K | M | P | G | Y |
| 3CFA   | L    | E | G | G | G | H       | Y | L | C | E | F | K | T | T | Y | K    | A | K | K | - | - | P | V | K | M | P | E | F |

| PDB-ID | Strand10 |   |   |   |   |   |   |   |   |   | Loop |   |     |   | Strand11 |   |   |   |   |   |   |   |   |   |   |
|--------|----------|---|---|---|---|---|---|---|---|---|------|---|-----|---|----------|---|---|---|---|---|---|---|---|---|---|
| 1EMA   | H        | Y | L | S | T | Q | S | A | L | S | K    | D | ... | D | H        | M | V | L | L | E | F | V | T | A | A |
| 3U0M   | H        | Q | V | S | H | R | L | E | R | L | Y    | D | ... | N | F        | V | Q | Q | R | L | H | A | V | A | K |
| 2DD7   | M        | F | T | H | R | R | V | E | E | T | H    | - | -   | E | N        | L | A | M | V | E | Y | Q | Q | V | F |
| 1XQM   | H        | F | E | D | H | R | I | E | I | M | E    | E | ... | K | C        | Y | K | Q | Y | E | A | A | V | G | R |
| 2WIS   | H        | F | V | T | I | I | T | K | Q | M | R    | D | ... | D | H        | V | C | Q | R | E | V | A | Y | A | H |
| 2RH7   | H        | F | I | Q | H | R | L | V | K | T | N    | V | -   | - | Y        | V | V | Q | H | E | T | A | I | A | A |
| 1G7K   | Y        | Y | V | D | S | K | L | D | I | T | S    | H | ... | T | I        | V | E | Q | Y | E | R | T | E | G | R |
| 2G6X   | M        | F | A | F | R | R | V | E | E | D | H    | - | -   | T | E        | L | G | I | V | E | Y | Q | H | A | F |
| 2P4M   | H        | F | E | D | H | R | I | E | V | K | E    | V | ... | K | H        | Y | E | Q | Y | E | A | A | V | A | R |
| 3CFA   | H        | Y | V | D | R | K | L | D | V | T | N    | H | ... | Y | S        | V | E | Q | C | E | I | S | I | A | R |

Here, PDB code of proteins is provided in the first column, chain name – in the 2nd column ('chain'), and the beginning and end position of each sequence in a domain – in the 3rd and 4th ('start' and 'end') columns, respectively. The sequences of the longer loops are not shown in their entirety, and the 'skipped' segments of loops are indicated by ellipses ("..."). The spaces within the sequences separate between secondary-structure units (strands and loops). The conserved hydrophobic and hydrophilic positions are shown in blue and green respectively.

**Table S9: SSS-based sequence alignment of GFP like proteins**

| PDB-ID | Chain | Start | End | Strand1 |   |   |   |   |   |   |   |   |   | Loop |   |     | Strand2 |   |     |     |   |   |   |   |   |   |   |   |   |
|--------|-------|-------|-----|---------|---|---|---|---|---|---|---|---|---|------|---|-----|---------|---|-----|-----|---|---|---|---|---|---|---|---|---|
|        |       |       |     | -       | V | P | I | L | V | E | L | D | G | D    | V | -   | N       | G | -   | ... | F | S | V | S | G | E | G | E | G |
| 1EMA   | A     | 12    | 227 | -       | V | P | I | L | V | E | L | D | G | D    | V | -   | N       | G | -   | ... | F | S | V | S | G | E | G | E | G |
| 3U0M   | A     | 4     | 222 | N       | M | R | M | K | V | V | L | E | G | S    | V | ... | N       | G | ... | ... | H | N | F | K | C | T | S | E | V |
| 2DD7   | A     | 4     | 212 | -       | F | K | I | E | S | R | I | H | G | N    | L | -   | N       | G | -   | ... | F | E | L | V | G | G | G | V | G |
| 1XQM   | A     | 9     | 220 | -       | M | P | F | K | T | T | I | E | G | T    | V | -   | N       | G | -   | ... | F | K | C | I | G | K | G | E | G |
| 2WIS   | B     | 12    | 223 | -       | M | T | F | K | I | F | I | D | G | E    | V | -   | N       | G | -   | ... | F | T | I | V | A | D | G | S | S |
| 2RH7   | B     | 11    | 221 | V       | M | P | T | K | I | N | L | E | G | L    | V | -   | G       | D | -   | ... | F | S | M | E | G | V | G | E | G |
| 1G7K   | A     | 12    | 220 | -       | M | R | F | K | V | R | M | E | G | T    | V | -   | N       | G | -   | ... | F | E | I | E | G | E | G | E | G |
| 2G6X   | B     | 4     | 215 | -       | M | E | I | E | C | R | I | T | G | T    | L | -   | N       | G | -   | ... | F | E | L | V | G | G | G | E | G |
| 2P4M   | A     | 12    | 220 | -       | M | T | Y | K | V | Y | M | S | G | T    | V | -   | N       | G | -   | ... | F | E | V | E | G | D | G | K | G |
| 3CFA   | A     | 88    | 219 | -       | - | - | - | - | - | - | - | - | - | -    | - | -   | -       | - | -   | ... | - | - | - | - | - | - | - | - | - |

| PDB-ID | Loop |   | Strand3 |   |   |   |   | Loop |   |   |   |   |   |   |   |   |     |   |   |   |   |     |   |   |   |   |   |   |   |   |   |   |
|--------|------|---|---------|---|---|---|---|------|---|---|---|---|---|---|---|---|-----|---|---|---|---|-----|---|---|---|---|---|---|---|---|---|---|
|        | Y    | G | K       | L | T | L | K | F    | T | T | G | K | L | P | V | P | ... | F | G | Y | G | ... | F | S | R | Y | P | D | H | M | K | R |
| 1EMA   | Y    | G | K       | L | T | L | K | F    | T | T | G | K | L | P | V | P | ... | F | G | Y | G | ... | F | S | R | Y | P | D | H | M | K | R |
| 3U0M   | M    | G | T       | Q | Y | M | A | I    | - | G | P | L | P | F | A | F | ... | Y | P | I | G | ... | F | K | W | S | F | P | E | G | K | W |
| 2DD7   | E    | G | R       | L | E | I | E | M    | K | D | K | P | L | A | F | S | ... | M | G | Y | G | ... | F | A | S | F | P | K | G | T | K | N |
| 1XQM   | E    | G | T       | Q | E | M | K | I    | - | G | G | P | L | P | F | A | ... | C | M | Y | G | ... | F | I | K | Y | V | S | G | I | P | D |
| 2WIS   | H    | G | D       | F | N | V | H | A    | E | T | G | K | L | P | M | S | ... | I | Q | Y | G | ... | F | A | R | Y | P | D | G | I | S | H |
| 2RH7   | E    | G | T       | Q | E | V | K | I    | - | G | A | P | L | P | F | A | ... | F | G | Y | G | ... | Y | T | G | Y | P | E | E | I | S | D |
| 1G7K   | E    | G | H       | N | T | V | K | L    | - | G | G | P | L | P | F | A | ... | F | Q | Y | G | ... | Y | V | K | H | P | A | D | I | P | D |
| 2G6X   | Q    | G | R       | M | T | N | K | M    | - | K | G | A | - | - | L | T | ... | M | G | Y | G | ... | F | G | T | Y | P | S | G | Y | E | - |
| 2P4M   | E    | G | E       | Q | T | V | K | L    | - | G | G | P | L | P | F | A | ... | - | Q | Y | G | ... | F | T | K | Y | P | E | D | I | P | D |
| 3CFA   | -    | - | -       | - | - | - | - | -    | - | - | - | - | - | - | - | - | ... | C | M | Y | G | ... | F | I | K | Y | V | S | G | I | P | D |

| PDB-ID | Loop |   |   |   | Strand4 |   |   |   |   |   |   |   | Loop |   |   |     | Strand5 |   |   |   |   |   |   |   |   |   |   |   |   |     |
|--------|------|---|---|---|---------|---|---|---|---|---|---|---|------|---|---|-----|---------|---|---|---|---|---|---|---|---|---|---|---|---|-----|
|        | ...  | P | E | G | -       | - | Y | V | Q | E | R | T | I    | F | F | K   | D       | D | G | - | N | Y | K | T | R | A | E | V | K | ... |
| 1EMA   | ...  | P | E | G | -       | - | Y | V | Q | E | R | T | I    | F | F | K   | D       | D | G | - | N | Y | K | T | R | A | E | V | K | ... |
| 3U0M   | ...  | - | T | G | G       | E | F | T | E | E | A | V | T    | R | Y | ... | E       | P | G | G | C | L | V | Y | H | A | Q | V | R | -   |
| 2DD7   | ...  | T | N | G | G       | - | Y | T | N | T | R | R | E    | I | Y | -   | E       | D | G | G | I | L | E | V | N | F | R | Y | T | ... |
| 1XQM   | ...  | P | E | G | -       | - | F | T | W | E | R | T | T    | T | Y | -   | E       | D | G | G | F | L | T | A | H | Q | D | T | S | ... |
| 2WIS   | ...  | P | E | G | -       | - | L | S | I | D | R | T | V    | R | F | E   | N       | D | G | - | T | M | T | S | H | H | T | Y | E | ... |
| 2RH7   | ...  | P | E | G | -       | - | F | T | Y | E | R | N | I    | R | Y | -   | Q       | D | G | G | T | A | I | V | K | S | D | I | S | ... |
| 1G7K   | ...  | P | E | G | -       | - | F | K | W | E | R | V | M    | N | F | -   | E       | D | G | G | V | V | T | V | T | Q | D | S | S | ... |
| 2G6X   | ...  | N | N | G | G       | - | Y | T | N | T | R | I | E    | K | Y | -   | E       | D | G | G | V | L | H | V | S | F | S | Y | R | ... |
| 2P4M   | ...  | P | E | G | -       | - | F | T | W | E | R | I | M    | N | F | -   | E       | D | G | A | V | C | T | V | S | N | D | S | S | ... |
| 3CFA   | ...  | P | E | G | -       | - | F | Y | W | E | R | T | T    | T | Y | -   | E       | D | G | G | F | L | T | A | H | Q | D | T | S | -   |

| PDB-ID | Loop |   |     | Strand6 |   |   |   |   |   |   |   | Loop |   |   |   |   |   |   |   |   |   |   |   |   |   |   |   |   |   |   |   |
|--------|------|---|-----|---------|---|---|---|---|---|---|---|------|---|---|---|---|---|---|---|---|---|---|---|---|---|---|---|---|---|---|---|
| 1EMA   | G    | D | -   | ...     | R | I | E | L | K | G | I | -    | D | F | K | E | D | G | N | I | L | G | H | K | L | E | Y | N | Y | N | S |
| 3U0M   | ...  | D | ... | -       | N | T | E | M | M | Y | P | A    | - | - | - | - | - | - | P | Q | I | P | Y | G | A | S | V | H | I | E | P |
| 2DD7   | F    | N | -   | ...     | D | V | E | C | I | G | H | -    | G | F | P | S | Q | S | P | I | F | K | D | T | I | - | V | K | S | C | G |
| 1XQM   | G    | D | -   | ...     | K | V | K | I | L | G | N | -    | N | F | P | A | D | G | P | V | M | Q | N | K | V | - | G | R | W | E | N |
| 2WIS   | -    | D | T   | ...     | R | I | T | V | N | C | D | -    | G | F | Q | P | D | G | P | I | M | R | D | Q | L | - | V | D | I | L | P |
| 2RH7   | E    | D | ... | ...     | N | V | D | F | K | A | K | -    | D | L | R | R | M | G | P | V | M | Q | Q | D | I | - | V | G | M | Q | D |
| 1G7K   | -    | D | G   | ...     | K | V | K | F | I | G | V | -    | N | F | P | S | D | G | P | V | M | Q | K | K | T | - | M | G | W | E | A |
| 2G6X   | -    | - | A   | ...     | D | F | K | V | M | G | T | -    | G | F | P | E | D | S | V | I | F | T | D | K | I | I | R | S | N | A | - |
| 2P4M   | G    | N | -   | ...     | H | V | K | F | S | G | L | -    | N | F | P | P | N | G | P | V | M | Q | K | K | T | - | Q | G | W | E | P |
| 3CFA   | L    | D | G   | ...     | K | V | K | I | L | G | N | -    | N | F | P | A | D | G | P | V | M | Q | N | K | A | - | G | G | W | E | N |

| PDB-ID | Strand7 |   |   |   |   |   |   |   | Loop |   |     | Strand8 |   |   |   |   |   |   |   |   |   |   |     | Loop |   |   |   |     |
|--------|---------|---|---|---|---|---|---|---|------|---|-----|---------|---|---|---|---|---|---|---|---|---|---|-----|------|---|---|---|-----|
| 1EMA   | H       | N | V | Y | I | M | A | D | K    | Q | ... | G       | I | K | V | N | F | K | I | R | H | N | -   | ...  | D | G | S | -   |
| 3U0M   | Y       | T | E | L | Y | H | Y | S | D    | G | -   | G       | L | R | G | Y | T | H | M | A | L | K | ... | ...  | D | G | G | ... |
| 2DD7   | T       | V | D | L | M | L | P | M | S    | G | -   | I       | I | A | S | S | Y | A | R | A | F | Q | L   | K    | D | G | S | -   |
| 1XQM   | G       | T | E | I | V | Y | E | V | D    | G | -   | V       | L | R | G | Q | S | L | M | A | L | K | C   | -    | P | G | G | -   |
| 2WIS   | N       | E | T | H | M | F | P | H | -    | G | ... | A       | V | R | Q | L | A | F | I | G | F | T | T   | A    | D | G | G | -   |
| 2RH7   | S       | Y | E | S | M | Y | T | N | V    | T | -   | S       | V | I | G | E | C | I | I | A | F | K | L   | Q    | T | G | K | -   |
| 1G7K   | S       | T | E | R | L | Y | P | R | D    | G | -   | V       | L | K | G | E | I | H | K | A | L | K | L   | K    | D | G | G | -   |
| 2G6X   | T       | V | E | H | L | H | P | - | M    | G | ... | D       | L | D | G | S | F | T | R | T | F | S | L   | R    | D | - | - | -   |
| 2P4M   | S       | S | E | R | L | F | A | R | -    | G | G   | M       | L | I | G | N | N | F | M | A | L | K | L   | E    | - | G | G | G   |
| 3CFA   | S       | C | E | I | L | Y | E | V | D    | G | -   | V       | L | C | G | Q | S | L | M | A | L | K | C   | -    | P | G | G | -   |

| PDB-ID | Strand9 |   |   |   |   |   |   |   |   |   |   | Loop |     |     |   |   |   |     |   | Strand10 |   |   |     |   |   |   |   |   |   |   |   |     |
|--------|---------|---|---|---|---|---|---|---|---|---|---|------|-----|-----|---|---|---|-----|---|----------|---|---|-----|---|---|---|---|---|---|---|---|-----|
| 1EMA   | -       | V | Q | L | A | D | H | Y | Q | Q | N | T    | P   | ... | G | P | V | ... | L | P        | D | N | H   | Y | L | S | T | Q | S | A | L | S   |
| 3U0M   | G       | H | L | S | C | S | F | V | T | T | Y | R    | -   | ... | G | N | I | -   | M | P        | G | - | ... | H | A | V | S | H | R | L | E | ... |
| 2DD7   | -       | F | Y | T | A | E | V | K | N | N | I | D    | F   | K   | N | P | I | ... | K | S        | G | P | M   | F | T | H | R | R | V | E | E | ... |
| 1XQM   | R       | H | L | T | C | H | L | H | T | T | Y | R    | S   | K   | K | P | A | ... | M | P        | G | H | H   | F | E | D | H | R | I | E | I | ... |
| 2WIS   | -       | L | M | M | G | H | F | D | S | K | M | T    | F   | ... | R | A | I | ... | I | P        | G | P | H   | F | V | T | I | I | T | K | Q | M   |
| 2RH7   | -       | H | F | T | Y | H | M | R | T | V | Y | K    | S   | K   | K | P | V | ... | M | P        | L | Y | H   | F | I | Q | H | R | L | V | K | ... |
| 1G7K   | -       | H | Y | L | V | E | F | K | S | I | Y | M    | A   | K   | K | P | V | ... | L | P        | G | Y | Y   | Y | V | D | S | K | L | D | I | ... |
| 2G6X   | -       | G | G | Y | Y | S | S | V | V | D | S | H    | ... | ... | H | P | S | ... | G | P        | - | - | M   | F | A | F | R | R | V | E | E | ... |
| 2P4M   | -       | H | Y | L | C | E | F | K | T | T | Y | K    | A   | K   | K | P | V | ... | M | P        | G | Y | H   | Y | V | D | R | K | L | D | V | ... |
| 3CFA   | R       | H | L | N | C | R | L | H | T | T | Y | R    | S   | K   | K | P | A | ... | M | P        | E | F | H   | F | E | D | H | R | I | E | V | ... |

| PDB-ID |  | Loop |   |   |     | Strand11 |   |   |   |   |   |   |   |   |   |   |
|--------|--|------|---|---|-----|----------|---|---|---|---|---|---|---|---|---|---|
|        |  | ...  | K | R | D   | H        | M | V | L | L | E | F | V | T | A | A |
| 1EMA   |  | ...  | K | R | D   | H        | M | V | L | L | E | F | V | T | A | A |
| 3U0M   |  | -    | N | E | ... | F        | V | V | Q | R | L | H | A | V | A | K |
| 2DD7   |  | T    | K | E | -   | N        | L | A | M | V | E | Y | Q | Q | V | F |
| 1XQM   |  | -    | K | G | K   | C        | Y | K | Q | Y | E | A | A | V | G | R |
| 2WIS   |  | ...  | K | R | D   | H        | V | C | Q | R | E | V | A | Y | A | H |
| 2RH7   |  | ...  | G | Y | -   | -        | - | V | Q | H | E | T | A | I | A | A |
| 1G7K   |  | N    | E | D | ... | I        | V | E | Q | Y | E | R | T | E | G | R |
| 2G6X   |  | ...  | T | - | -   | E        | L | G | I | V | E | Y | Q | H | A | F |
| 2P4M   |  | N    | K | D | ... | S        | V | E | Q | C | E | I | S | I | A | R |
| 3CFA   |  | -    | K | G | K   | H        | Y | E | Q | Y | E | A | A | V | A | R |

Here, PDB code of proteins is provided in the first column, chain name – in the 2nd column ('chain'), and the beginning and end position of each sequence in a domain – in the 3rd and 4th ('start' and 'end') columns, respectively. The sequences of the longer loops are not shown in their entirety, and the 'skipped' segments of loops are indicated by ellipses ("..."). The spaces within the sequences separate between secondary-structure units (strands and loops). The conserved hydrophobic and hydrophilic positions are shown in blue and green respectively.

**Table S10: Fold detection results using OCR<sup>S</sup> fingerprints for GFP-like protein against the PDB**

|       |        |       |       |        |       |       |       |       |       |
|-------|--------|-------|-------|--------|-------|-------|-------|-------|-------|
| 2WISA | 3SS0A  | 3OGOB | 3DQ3A | 3NEDA  | 2AWKA | 2B3PA | 1YJFA | 3SSHA | 4L12A |
| 2AWJA | 3CIYA  | 3OGOC | 2V4EA | 2YE1A  | 1H6RA | 3V3DA | 3LVAA | 1B9CA | 3VHTA |
| 3DQ8A | 4KA9A  | 3OGOD | 2V4EB | 3LVCA  | 1HUYA | 2WURA | 3LVAB | 1Z1QA | 3DQ6A |
| 3ST3A | 2JADA  | 3GL4A | 3A8SA | 3ST2A  | 4AS8A | 1OXDA | 1QXTA | 1RM9A |       |
| 1XQMA | 4J8AA  | 3GL4B | 3A8SB | 3ST2B  | 3NEZA | 3DQKA | 4GESB | 4BDUA |       |
| 3LVDA | 3DQUA  | 1EMKA | 1H4UA | 3ST2C  | 2HGDA | 4JFGA | 2G6YA | 4BDUB |       |
| 4H47A | 3DQCA  | 1S6ZA | 1QYQA | 1ZGPA  | 3SVEA | 3DQ5A | 3ST4A | 4BDUC |       |
| 3DQ4A | 3CIGA  | 3AI4A | 4AR7A | 1JBZA  | 2FZUA | 3DQOA | 3ST4B | 4BDUD |       |
| 3SSLA | 3SSKA  | 3DQNA | 1Q4AA | 1F0BA  | 1EMGA | 2YE0A | 3ST4C | 3GB3A |       |
| 4LQTA | 3DQ1A  | 1HCJA | 2Q57A | 2QU1A  | 2VAEA | 4OJ0A | 4J88A | 3GB3B |       |
| 1QYOA | 2YFPA  | 1HCJB | 3SV5A | 4L1IA  | 2AWLA | 4OJOB | 3GEXA | 2QLEA |       |
| 2G6EA | 4LQUA  | 1HCJC | 3DQHA | 1GFLA  | 1Q4DA | 4OJ0C | 3SSPA | 4OGSA |       |
| 1W7UA | 1KYS A | 1HCJD | 1ZGQA | 1GFLB  | 3I19A | 4OJ0D | 2HCGA | 4B30A |       |
| 3UG0A | 3DPZA  | 1YFPA | 3KCSA | 1EMMA  | 3SSTA | 1W7SA | 1Q4CA | 3SSVA |       |
| 2H6VA | 1W7TA  | 1YFPB | 1BFPA | 2EMDA  | 1Z1PA | 3DQJA | 1EMFA | 4ACQA |       |
| 2H9WA | 1GGXA  | 2DD7A | 3DQDA | 4ANJA  | 1GL4A | 4H48A | 2G6XA | 2EMNA |       |
| 4L13A | 3WCKA  | 2DD7B | 2DUEA | 4P7HA  | 4KW9A | 3CGLA | 2AWMA | 4EULA |       |
| 4KW8A | 1EMCA  | 2DUHA | 2H8QA | 3K1KA  | 1JC0A | 2OKYA | 4EN1A | 1F09A |       |
| 2AHAA | 1C4FA  | 2DUGA | 2QRFA | 3DQ9A  | 1JC0B | 2YDZA | 4EN1B | 3SRYA |       |
| 1RMOA | 3SSYA  | 1CV7A | 2RH7A | 2O29A  | 1JC0C | 2WIQA | 2OKWA | 2Y0GA |       |
| 3AI5A | 2HJOA  | 2Q6PA | 1QYFA | 3OSRA  | 3UFZA | 2WIQB | 3DQMA | 1YHHA |       |
| 1KP5A | 3DQAA  | 1YJ2A | 2H5QA | 2WSOA  | 1EMAA | 1OXEA | 1JC1A | 3DQFA |       |
| 2H5PA | 3SVCA  | 3DPXA | 1QY3A | 3LF3A  | 2G3OA | 4KF4A | 1JC1B | 3DQ2A |       |
| 3SVBA | 1Q4EA  | 1KYPA | 3DPWA | 1Q73A  | 4JRBA | 2HFCA | 1JC1C | 4B5YA |       |
| 2QZ0A | 1YHGA  | 3GJ1A | 3GJ2A | 1Q4BA  | 2AH8A | 2H5RA | 1KYRA | 2HRSA |       |
| 1MYWA | 1YHGB  | 3GJ1B | 3GJ2B | 2HG YA | 2DUFA | 3DQEA | 2DD9A | 1RMPA |       |
| 2O24A | 1XMZA  | 3GJ1C | 1YHIA | 3SVDA  | 2EMOA | 3LA1A | 1EMEA | 1YZWA |       |
| 4KF5C | 1XMZB  | 3GJ1D | 1JBYA | 4J89A  | 1EMLA | 3KCTA | 2O2BA | 1EMBA |       |
| 2HQZA | 3G9AA  | 1OXFA | 1ZGOA | 4J89B  | 2AWKA | 3DQ7A | 3ST0A | 4KW4A |       |
| 3DQLA | 3OGO A | 2WSNA | 2B3QA | 3ZTFA  | 1H6RA | 3DQIA | 1RMMA | 2QT2A |       |

Table listed the PDB ID of the 273 GFP homologous protein identified by the fold detection using the OCR<sup>S</sup> fingerprints against the Protein Data Bank. The PDB ID of the identified nidogen-1 domain protein is highlighted in yellow color.

**Table S11: Fold detection results using PSI-BLAST search for GFP-like protein against the PDB**

|       |       |       |       |       |       |       |       |
|-------|-------|-------|-------|-------|-------|-------|-------|
| 1GFLA | 2HGYA | 2YDZA | 3EKHA | 3LS3A | 3VK1A | 3GL4A | 4DKMA |
| 1EMB  | 1QYQA | 4JRBA | 3SG2A | 3ZULA | 1XSSA | 3GL4B | 2G30A |
| 1BFPA | 2QT2A | 4AS8A | 3SG4A | 3ZUJA | 3IP2A | 4OHSB | 2GW4A |
| 1Q4CA | 4KA9A | 4AR7A | 2HPWA | 3ZUFA | 2H5OA | 2GW4B | 2A50A |
| 1HCJA | 1YJ2A | 3GJ1A | 3AKOB | 4EMQA | 1XAEA | 3H1OA | 4HVFA |
| 1S6ZA | 3V3DA | 4LQTA | 2G16A | 2A48A | 3PIBA | 4KGEA | 1OJ7A |
| 1QYOA | 3SSPA | 4KW4A | 2G2SA | 2A46A | 4EDOA | 4H3MA |       |
| 2DUGA | 2FWQA | 4LQUA | 3WCKA | 4OJ0A | 3BX9A | 2QLHA |       |
| 2QLEA | 3ST0A | 2Q6PA | 3GB3A | 2GX0A | 3RWAA | 3NF0A |       |
| 4OGSA | 1H6RA | 1YFPA | 4DXOA | 2Z1OA | 3PIBA | 2QLIA |       |
| 2DUEA | 1EMAA | 2QRFA | 2VVHA | 2IE2A | 3RWTA | 4H3LA |       |
| 1Q4EA | 2HRSA | 1KP5A | 4LJDC | 4HQ8A | 2FL1A | 2QLGA |       |
| 4GESB | 3SRYA | 3LVCA | 3TMRA | 4IZNA | 2ICRA | 4H3NA |       |
| 1EMMA | 2WSNA | 4ANJA | 4LJDA | 4HQCD | 4OHSB | 3LF4B |       |
| 1YHIA | 3W1CA | 2QZ0A | 4LJCA | 2Z6XA | 2H5PA | 4DKNA |       |
| 1EMFA | 1KYPA | 4EN1A | 1ZUXA | 4HQCC | 2H5QA | 3CFAA |       |
| 2WURA | 3A15A | 3UFZA | 2GW3A | 2DDCA | 3NEDA | 2VAEA |       |
| 2OKWA | 3W1DA | 4LW5A | 4B30B | 3U0KA | 3SVNA | 3CFFA |       |
| 1YHHA | 3VHTA | 1RRXA | 3A8SA | 3M22A | 3PJ7A | 2A50B |       |
| 2HFCA | 4JFGA | 3U8PA | 3P8UA | 3IR8A | 3SVUA | 2A53B |       |
| 2HQZA | 2B3PA | 4KF5A | 2OTBA | 3LF3A | 3SVOA | 3NEZA |       |
| 2HJOA | 4BDUA | 3P28A | 2HQKA | 2OJKA | 3PI5A | 2H8QA |       |
| 1EMCA | 2JADA | 3EVRA | 2BTJA | 1MOUA | 3M24A | 1GGXA |       |
| 2YFPA | 3VHTB | 3WLCB | 3S05A | 2WHSA | 3U8AA | 1ZGPA |       |
| 3G9AA | 1QY3A | 3SG3A | 3S05B | 3VICA | 3NT9A | 4I2YA |       |
| 1HUYA | 3K1KA | 3EK8A | 4DXIA | 3E5VA | 3NT3A | 4KF4A |       |
| 2B3QA | 3ST2A | 4IK1A | 4DXMA | 2RH7A | 3OGOA | 2V4EC |       |
| 3OGOA | 3LA1A | 3SG6A | 4Q9WA | 3E5WA | 3OGOB | 2G6XA |       |
| 1YJFA | 2QU1A | 3EVUA | 3KCSA | 2P4MA | 3OGOC | 1G7KA |       |
| 1B9CA | 2WSOA | 3EKJA | 3U0LA | 1MOVA | 3OGOD | 3CFAL |       |

Table listed the PDB ID of the 216 GFP homologous protein identified by the fold detection using PSI-BLAST search against the Protein Data Bank.



**Table S12: Fold detection results using HMMER search for GFP-like protein against the PDB**

|        |       |       |       |       |       |        |       |
|--------|-------|-------|-------|-------|-------|--------|-------|
| 1C4FA  | 2B3QA | 3VHTB | 1H6RA | 2H5OA | 3MGFA | 3E5TA  | 1XAEA |
| 1Q4CA  | 1EMKA | 3AI4A | 3CB9A | 3GB3A | 2Z6XA | 2RH7A  | 2ICRA |
| 1W7SA  | 1B9CA | 2HFCA | 4AR7A | 1ZUXA | 2A48A | 2ARLA  | 2GW4B |
| 2Q6PA  | 3G9AA | 1YJ2A | 2WSOA | 2BTJA | 2A46A | 2P4MA  | 4DKNA |
| 2QLEA  | 2QU1A | 3W1DA | 1KP5A | 4B30A | 4OJ0A | 3IP2A  | 4JEOA |
| 1Q4EA  | 1JCOA | 1YHHA | 1RMMA | 2H5PA | 3ADFA | 3T6HA  | 2G6XA |
| 1GFLA  | 4ANJA | 2B3PA | 3U8PA | 4DXPA | 2DDCA | 1MOVA  | 2G3OA |
| 1HCJA  | 4ANJA | 4BDUA | 2QZ0A | 2OTBA | 3ZUFA | 4EDSA  | 3CFAA |
| 1Q73A  | 2H6VA | 2WSNA | 2AWLA | 4DXOA | 3LS3A | 4OQWA  | 3CFFA |
| 2OKWA  | 3SSPA | 2FWQA | 1OXDA | 3P8UA | 2Z06A | 4EDOA  | 4DKMA |
| 2DUIA  | 2QT2A | 3ST2A | 1QYFA | 2GW3A | 2VAEA | 3PIBA  | 2A52B |
| 2DUGA  | 4GESB | 4JRBA | 2AWKA | 3S05A | 4KF4A | 3PJBA  | 3LF4A |
| 1BFPA  | 2HGDA | 4JRBA | 4L12A | 2VADA | 1XQMA | 3RWAA  | 2DD9A |
| 1EMMA  | 2H9WA | 1QYQA | 1QXTA | 2H5QA | 2H8QA | 3BX9A  | 4HVFA |
| 1JBYA  | 3DPWA | 1KYPA | 1OXFA | 3KCSA | 2V4EC | 3RWTF  | 2DD7A |
| 2DUEA  | 3SRYA | 4J8AA | 1CV7A | 3NEDA | 1GGXA | 3VK1A  | 3CFAL |
| 2HJOA  | 1RMOA | 1RRXA | 3OSQA | 4JC2A | 1XMZA | 3PJ5A  | 2GW4A |
| 2HQZA  | 1QYOA | 4KW4A | 4LW5A | 3NEZA | 3M22A | 3SVNA  | 2A50A |
| 2EMDA  | 2FZUA | 3CD1A | 3EKJA | 3LF3A | 3E5VA | 2C9JA  |       |
| 2WURA  | 1YJFA | 3LA1A | 3O77A | 4EMQA | 4I2YA | 3SVOA  |       |
| 1F09A  | 2HGYA | 2YE0A | 3ED8A | 3U0LA | 1G7KA | 3SVUA  |       |
| 1HUYA  | 3ST0A | 2Q57A | 4KF5A | 2GX2A | 1ZGPA | 2OJKA  |       |
| 1Z1PA  | 2AH8A | 3ZTFA | 2G3DB | 3NF0A | 1ZGQA | 4OHS A |       |
| 1S6ZA  | 2HCGA | 4GF6B | 3AKOA | 2A47A | 2Z07A | 3NT3A  |       |
| 2YFPA  | 2AHAA | 2YDZA | 4HE4A | 4H3MA | 1UISA | 2PXSA  |       |
| 1EMCA  | 3W1CA | 1YFPA | 4KF5C | 2GX0A | 2C9IA | 3U8AA  |       |
| 4EULA  | 2G6EA | 4LQUA | 4DXNA | 3UOKA | 2V4EB | 3H1OA  |       |
| 1EMFA  | 1YHIA | 2YE1A | 2HQKA | 2IOVA | 1XSSA | 3M24A  |       |
| 3OGO A | 1MYWA | 4H47A | 3WCKA | 4H3NA | 3E5WA | 4KPIA  |       |
| 2YOGA  | 1YHGA | 3GEXA | 2VVHA | 2ZMUA | 1MOUA | 4KGEA  |       |

Table listed the PDB ID of the 228 GFP homologous protein identified by the fold detection using HMMER against the Protein Data Bank.

**Table S13: Fold detection results using HHpred for GFP-like protein against the PDB**

|        |        |        |        |       |       |       |        |        |
|--------|--------|--------|--------|-------|-------|-------|--------|--------|
| 4KW9A  | 3LS3A  | 3IR8A  | 1QY3A  | 2VADA | 3G9AA | 1EMMA | 4EN1A  | 2WURA  |
| 2H5OA  | 3ZUFA  | 2WSOA  | 2G6EA  | 3SG6A | 2G16B | 1YHIA | 3UFZA  | 3VK1A  |
| 2A47A  | 2IB5A  | 2A46A  | 3DQ7A  | 4L13A | 2AWLA | 1HUYA | 2QZ0A  | 4J89A  |
| 2IE2A  | 4IK8A  | 2DUEA  | 1OXDA  | 3U0LA | 2Y0GA | 2B3QA | 2HCGA  | 2YE1A  |
| 3SVNA  | 4P7HA  | 3ST4A  | 1F0BA  | 2OTBA | 2O24A | 3GL4A | 1QYFA  | 3AKOB  |
| 3RWAA  | 3IP2A  | 3U0KA  | 1F09A  | 3U8AA | 2QU1A | 1UISA | 1G7KA  | 4J8AA  |
| 3SVUA  | 3KCSA  | 2HQKA  | 3GJ1A  | 4LW5A | 1YFPA | 1HCJB | 2RH7A  | 3I19A  |
| 4H48A  | 1ZGOA  | 2VVIA  | 2EMDA  | 4HE4A | 2AWJA | 3H1OA | 4DKMA  | 2ZO6A  |
| 3CD1A  | 3ST4C  | 3NEZA  | 1QXTA  | 1XMZB | 1JBYA | 2OKWA | 3A8SB  | 3LVAA  |
| 1RRXA  | 4J88A  | 2ZO6A  | 1YHGA  | 4HQ8A | 1ZUXA | 1YHHA | 4HQCD  | 1KYP A |
| 3GEXA  | 3EVUA  | 2WSNA  | 4OQWA  | 4IZNA | 4HQCC | 2HFCA | 2HPWA  | 1YJ2A  |
| 1QYOA  | 3SG2A  | 3W1CA  | 4EDOA  | 3VHTB | 2DDCA | 3LVCA | 4JRBA  | 3U0KA  |
| 3ST2B  | 2DD7A  | 4I2YA  | 3PIBA  | 2JADA | 4LJCA | 3E5VA | 3GB3A  | 1KP5A  |
| 2ZO7A  | 2G2SA  | 3OSQA  | 3PJBA  | 3AI4A | 1ZGQA | 3P28A | 3E5TA  | 3WLDA  |
| 4OHS A | 2G16A  | 2H8QA  | 3RWAA  | 2GW3A | 2HPWA | 3AKOA | 2HRSA  | 1MOVA  |
| 2C9IA  | 3CGLA  | 4KGEA  | 3BX9A  | 3WCKA | 2EMOA | 1XMZA | 3AI5A  | 1RM9A  |
| 2C9JA  | 2GX0A  | 2Z1OA  | 3RWTF  | 3NEDA | 3ST0A | 2ICRA | 4B30B  | 1EMLA  |
| 3EVP A | 2POXA  | 3NT3A  | 3PJ5A  | 3ST4B | 2HGYA | 2C9IA | 3A8SA  | 3AI5A  |
| 1YZWA  | 2YFPA  | 1MOUA  | 2C9JA  | 4P7HA | 2IOVA | 2C9JA | 4BDUA  | 3SVRA  |
| 4OHS A | 2QLEA  | 4LJDC  | 4OHS A | 3SRYA | 3M24A | 1QYQA | 4DXOA  | 4Q9WA  |
| 2H5QA  | 3AKOA  | 3TMRA  | 4L12A  | 2WURA | 2OTEA | 1CV7A | 2HQZA  | 2GW3A  |
| 3GJ1D  | 3BXCA  | 2ZMUA  | 3EKJA  | 4EN1A | 4IK8A | 2QRFA | 2HJOA  | 2IB5A  |
| 3GL4B  | 2G6YA  | 3U8PA  | 3O77A  | 2VAEA | 4HQ9A | 2DUGA | 1XQMA  | 1ZGPA  |
| 1Q4EA  | 3EVP A | 4KP IA | 4KF5A  | 2A46A | 4AR7A | 2PXA  | 4KF5C  |        |
| 4GESB  | 3E5WA  | 3M22A  | 2G3DB  | 3EVRA | 4HQCA | 2V4EB | 3P8UA  |        |
| 3OGO A | 4OGSA  | 4DKNA  | 3SSPA  | 4DXNA | 4OJ0B | 1XSSA | 3EVP A |        |
| 4IK9A  | 2A50A  | 4HVFA  | 3CGLA  | 3SVOA | 4ANJA | 4HE4A | 3GB3A  |        |
| 3DQKA  | 1KYSA  | 4LJDA  | 3W1DA  | 1EMCA | 2B3PA | 1EMKA | 1YJFA  |        |
| 4BDUA  | 1OXFA  | 2A50B  | 3VHTA  | 1EMFA | 1RMOA | 3OSRA | 2H5PA  |        |
| 4L1IA  | 3ED8A  | 2Z6XA  | 2A48A  | 1B9CA | 2OJKA | 3SV5A | 4JC2A  |        |

Table listed the PDB ID of the 248 GFP homologous protein identified by the fold detection using HHpred against the Protein Data Bank.

**Table S14: Fold detection results using FASTA search for GFP-like protein against the PDB**

|       |       |       |       |       |       |       |        |       |
|-------|-------|-------|-------|-------|-------|-------|--------|-------|
| 1QYOA | 2DUHA | 1JBZA | 4J89A | 2G16B | 3GB3A | 2H8QA | 3VK1A  | 3SVRA |
| 1GFLA | 1Q73A | 3K1KA | 2OKWA | 3AKOA | 3GL4A | 2Z6XA | 1MOVA  | 3SVUA |
| 2FZUA | 4GF6B | 2HGDA | 1QYFA | 4IK9A | 2HQKA | 2VAEA | 1UISA  | 3BXCA |
| 2HCGA | 4EULA | 1JC1A | 1KYPA | 3WLDA | 2VVIA | 2A46A | 2A48A  | 3NT3A |
| 3MIQA | 2Y0GA | 1RMMA | 1YJ2A | 3EVUA | 4LJCA | 4HQCA | 4I2YA  | 2IB5A |
| 3OGO  | 2O24A | 2EMNA | 1RM9A | 3SG2A | 3TMRA | 3KCSA | 2PXSA  | 3U8AA |
| 1W7SA | 2HFCA | 1KP5A | 4L13A | 4IK8A | 2GW3A | 1ZGOA | 2ZO6A  | 3IP2A |
| 2AH8A | 2QU1A | 4ANJA | 2HRSA | 3EVRA | 3P8UA | 3NEZA | 1XSSA  | 4KGEA |
| 1W7TA | 1HUYA | 2HJOA | 4AS8A | 3WLCA | 4B30A | 2QLHA | 1YZWA  |       |
| 2WURA | 1EMCA | 3SSYA | 4EN1A | 3SG7A | 2VVJA | 4H3LA | 1XA9A  |       |
| 1Q4AA | 2DUGA | 2QT2A | 2YDZA | 3EKJA | 3A8SA | 2QLGA | 3E5TA  |       |
| 2QLEA | 1YFPA | 1JC0A | 2AWMA | 3EVVA | 4DXIA | 3NFOA | 2PSLA  |       |
| 1HCJA | 2AWJA | 1B9CA | 4L1IA | 3OSRA | 3S05A | 2V4EA | 1XAEA  |       |
| 1BFPA | 1QY3A | 2EMOA | 1KYSA | 3SG6A | 2VADA | 3U0KA | 3T6HA  |       |
| 3VHTA | 2B3QA | 3ST0A | 1OXFA | 3EVPA | 2H5PA | 2C9JA | 2OGRA  |       |
| 2JADA | 3SRYA | 2HGYA | 2YE1A | 4HE4A | 4JC2A | 2DDCA | 2EJIA  |       |
| 3AI4A | 1YHIA | 1EMKA | 4J8AA | 2HPWA | 3U0LA | 3VICA | 2Z07A  |       |
| 4GESB | 2G6EA | 2B3PA | 3I19A | 3OSQA | 2H5OA | 3LF3A | 2ICRA  |       |
| 1EMAA | 3DQ7A | 1RMOA | 2DUEA | 3AKOB | 2A47A | 1MOUA | 2FL1A  |       |
| 1EMGA | 1OXDA | 2WSNA | 2WSOA | 2G2SA | 2IE2A | 3CGLA | 4EDSA  |       |
| 1Q4CA | 3G9AA | 2QRFA | 4AR7A | 2G16A | 2Z10A | 4H3MA | 4OQWA  |       |
| 1S6ZA | 1F0BA | 1QYQA | 3UFZA | 4DXNA | 2GX0A | 2C9IA | 3PJBA  |       |
| 1Z1QA | 1F09A | 1CV7A | 4H48A | 1ZUXA | 2POXA | 2OJKA | 3BXAA  |       |
| 3V3DA | 1YJFA | 3LVAA | 3CD1A | 2OTEA | 3LS3A | 3IR8A | 3M22A  |       |
| 1C4FA | 3GJ1A | 1EMLA | 1RRXA | 2OTBA | 3ZUFA | 2WHTA | 3PIBA  |       |
| 1Q4DA | 2EMDA | 2AWLA | 3ED8A | 4DXOA | 4HQ9A | 1XQMA | 3RWAA  |       |
| 3ZTFA | 1QXTA | 2QZ0A | 2Q6PA | 2BTJA | 2H5QA | 3E5VA | 4OHS A |       |
| 4JRBA | 1YHGA | 1MYWA | 4LW5A | 2VZXA | 4HQ8A | 2RH7A | 3PJ5A  |       |
| 4BDUA | 3SVCA | 2AHAA | 3U8PA | 2WIQA | 2EJOA | 2P4MA | 3M24A  |       |
| 3VHTB | 1H6RA | 2Q57A | 2G2SB | 3NEDA | 3ADFA | 3E5WA | 4OQWE  |       |

Table listed the PDB ID of the 248 GFP homologous protein identified by the fold detection using FASTA search against the Protein Data Bank.

**Table S15. Sequence similarity among the identified “*Potential distant Cupredoxin Homologs*” sequences.**

|              | IAAJ | WP_010687666 | WP_019903657 | WP_019121393 | WP_019155648 | WP_015594375 | WP_008636814 | WP_019379850 | WP_021320206 | WP_021239068 | WP_004263537 | WP_019883210 | WP_008217106 | WP_020895055 |
|--------------|------|--------------|--------------|--------------|--------------|--------------|--------------|--------------|--------------|--------------|--------------|--------------|--------------|--------------|
| IAAJ         | 100  | 17.71        | 23.96        | 16.85        | 22.92        | 17.53        | 19.15        | 20.62        | 23.33        | 23.33        | 15.22        | 17.48        | 16.5         | 15.79        |
| WP_010687666 |      | 100          | 49.09        | 19.1         | 19.23        | 18.1         | 16.35        | 16.19        | 18.75        | 18.18        | 27.36        | 23.28        | 16.5         | 13.68        |
| WP_019903657 |      |              | 100          | 16.28        | 20.62        | 18.37        | 21.65        | 16.33        | 22.68        | 19.1         | 26.73        | 23.68        | 21.9         | 17.02        |
| WP_019121393 |      |              |              | 100          | 55.12        | 57.81        | 58.91        | 58.14        | 14.77        | 12.5         | 21.18        | 15.22        | 16.81        | 13.04        |
| WP_019155648 |      |              |              |              | 100          | 55.41        | 53.79        | 62.16        | 15.15        | 16.13        | 14.14        | 12.61        | 21.09        | 15.87        |
| WP_015594375 |      |              |              |              |              | 100          | 50           | 60.4         | 15           | 14.89        | 17           | 13.39        | 18.6         | 14.96        |
| WP_008636814 |      |              |              |              |              |              | 100          | 55.78        | 11.88        | 11.83        | 22           | 14.78        | 18.6         | 16.94        |
| WP_019379850 |      |              |              |              |              |              |              | 100          | 14.85        | 11.58        | 12           | 12.5         | 16.15        | 13.39        |
| WP_021320206 |      |              |              |              |              |              |              |              | 100          | 65.67        | 17.21        | 16.91        | 19.47        | 12.77        |
| WP_021239068 |      |              |              |              |              |              |              |              |              | 100          | 18.35        | 17.07        | 19.42        | 14.44        |
| WP_004263537 |      |              |              |              |              |              |              |              |              |              | 100          | 44.85        | 21.82        | 13.19        |
| WP_019883210 |      |              |              |              |              |              |              |              |              |              |              | 100          | 21.67        | 12.12        |
| WP_008217106 |      |              |              |              |              |              |              |              |              |              |              |              | 100          | 11.38        |
| WP_020895055 |      |              |              |              |              |              |              |              |              |              |              |              |              | 100          |

Table listed the amino acid sequence similarities (%) among 13 identified *Potential distant Cupredoxin Homologs* and the representative Cupredoxin protein (IAAJ) identified using clustalW2. No significant sequence similarity is found between the identified protein sequences and the representative Cupredoxin-like protein, with the maximum sequence identity of 23.96%.
